# Supplementary material for: Trends in long-term opioid prescriptions for musculoskeletal conditions in Australian general practice: a national longitudinal study using MedicineInsight, 2012–2018
Source: PubMed Central journal article supplement — BMJ Open. 2021 Apr 7;11(4):e045418. doi: 10.1136/bmjopen-2020-045418 (PMC8031026; doi:10.1136/bmjopen-2020-045418), 2021-04-07
Supplement: bmjopen-2020-045418.draft_revisions.pdf [file bmjopen-2020-045418.draft_revisions.pdf]

# BMJ Open

BMJ Open is committed to open peer review. As part of this commitment we make the peer review history of every article we publish publicly available.

When an article is published we post the peer reviewers' comments and the authors' responses online. We also post the versions of the paper that were used during peer review. These are the versions that the peer review comments apply to.

The versions of the paper that follow are the versions that were submitted during the peer review process. They are not the versions of record or the final published versions. They should not be cited or distributed as the published version of this manuscript.

BMJ Open is an open access journal and the full, final, typeset and author-corrected version of record of the manuscript is available on our site with no access controls, subscription charges or pay-per-view fees (<http://bmjopen.bmj.com>).

If you have any questions on BMJ Open's open peer review process please email [info.bmjopen@bmj.com](mailto:info.bmjopen@bmj.com)

# BMJ Open

## Trends in long-term opioid prescriptions for musculoskeletal conditions in Australian general practice: a national longitudinal study using MedicineInsight, 2012-2018

|                               |                                                                                                                                                                                                                                                                                                                                                                                                                                                                           |
|-------------------------------|---------------------------------------------------------------------------------------------------------------------------------------------------------------------------------------------------------------------------------------------------------------------------------------------------------------------------------------------------------------------------------------------------------------------------------------------------------------------------|
| Journal:                      | <i>BMJ Open</i>                                                                                                                                                                                                                                                                                                                                                                                                                                                           |
| Manuscript ID                 | bmjopen-2020-045418                                                                                                                                                                                                                                                                                                                                                                                                                                                       |
| Article Type:                 | Original research                                                                                                                                                                                                                                                                                                                                                                                                                                                         |
| Date Submitted by the Author: | 01-Oct-2020                                                                                                                                                                                                                                                                                                                                                                                                                                                               |
| Complete List of Authors:     | Black-Tiong, Sean; The University of Adelaide Faculty of Health and Medical Sciences, Discipline of General Practice, Adelaide Medical School<br>Gonzalez-Chica, David; The University of Adelaide Faculty of Health and Medical Sciences, Discipline of General Practice, Adelaide Medical School;<br>The University of Adelaide, Adelaide Rural Clinical School<br>Stocks, Nigel; The University of Adelaide Faculty of Health Sciences, Discipline of General Practice |
| Keywords:                     | Musculoskeletal disorders < ORTHOPAEDIC & TRAUMA SURGERY, PAIN MANAGEMENT, EPIDEMIOLOGY, Back pain < ORTHOPAEDIC & TRAUMA SURGERY, PRIMARY CARE, PUBLIC HEALTH                                                                                                                                                                                                                                                                                                            |
|                               |                                                                                                                                                                                                                                                                                                                                                                                                                                                                           |

SCHOLARONE™  
Manuscripts

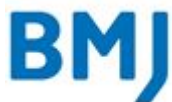

I, the Submitting Author has the right to grant and does grant on behalf of all authors of the Work (as defined in the below author licence), an exclusive licence and/or a non-exclusive licence for contributions from authors who are: i) UK Crown employees; ii) where BMJ has agreed a CC-BY licence shall apply, and/or iii) in accordance with the terms applicable for US Federal Government officers or employees acting as part of their official duties; on a worldwide, perpetual, irrevocable, royalty-free basis to BMJ Publishing Group Ltd ("BMJ") its licensees and where the relevant Journal is co-owned by BMJ to the co-owners of the Journal, to publish the Work in this journal and any other BMJ products and to exploit all rights, as set out in our [licence](#).

The Submitting Author accepts and understands that any supply made under these terms is made by BMJ to the Submitting Author unless you are acting as an employee on behalf of your employer or a postgraduate student of an affiliated institution which is paying any applicable article publishing charge ("APC") for Open Access articles. Where the Submitting Author wishes to make the Work available on an Open Access basis (and intends to pay the relevant APC), the terms of reuse of such Open Access shall be governed by a Creative Commons licence – details of these licences and which [Creative Commons](#) licence will apply to this Work are set out in our licence referred to above.

Other than as permitted in any relevant BMJ Author's Self Archiving Policies, I confirm this Work has not been accepted for publication elsewhere, is not being considered for publication elsewhere and does not duplicate material already published. I confirm all authors consent to publication of this Work and authorise the granting of this licence.

1  
2  
3 **1 Trends in long-term opioid prescriptions for musculoskeletal conditions in Australian**  
4 **2 general practice: a national longitudinal study using MedicineInsight, 2012-2018**

5  
6  
7 3 Short Title: Trends in long-term opioid prescribing in Australia  
8  
9

10 4  
11  
12 5  
13  
14 6 Sean Black-Tiong<sup>1</sup>

15  
16 7 [sean.black-tiong@adelaide.edu.au](mailto:sean.black-tiong@adelaide.edu.au)  
17

18 8 David Alejandro Gonzalez-Chica<sup>1,2</sup>

19  
20 9 [david.gonzalez@adelaide.edu.au](mailto:david.gonzalez@adelaide.edu.au)  
21

22 10 Nigel Stocks<sup>1</sup>

23  
24 11 [nigel.stocks@adelaide.edu.au](mailto:nigel.stocks@adelaide.edu.au)  
25  
26 12

27  
28 13 <sup>1</sup> Discipline of General Practice, Adelaide Medical School, The University of Adelaide,  
29 14 Adelaide, SA, Australia

30 15 <sup>2</sup> Adelaide Rural Clinical School, The University of Adelaide, Adelaide, SA, Australia  
31  
32  
33 16

34 17 Corresponding author:

35  
36 18 David Alejandro Gonzalez-Chica

37  
38 19 Discipline of General Practice, The University of Adelaide, Helen Mayo North building, 109  
39 20 Frome Road, Level 1, Room 113. Adelaide, 5005, South Australia, Australia.

40  
41 21 E-mail: [david.gonzalez@adelaide.edu.au](mailto:david.gonzalez@adelaide.edu.au)  
42

43 22 Phone: +61 8 8313 1631  
44  
45 23  
46  
47 24  
48  
49 25  
50  
51 26

52  
53  
54 27 Word count: 3,396  
55  
56 28  
57  
58  
59  
60

## 1 ABSTRACT

2 **Objective:** Describe trends and patterns in long-term opioid prescriptions among adults with  
3 musculoskeletal conditions (MSK).

4 **Design:** Interrupted time-series analysis based on an open cohort study

5 **Setting:** A representative sample of 402 Australian general practices contributing data to the  
6 MedicineInsight database.

7 **Participants:** 811,174 patients aged 18+ years with a diagnosis of MSK and three or more  
8 consultations in any two consecutive years between 2012 and 2018. Males represented 44.5%  
9 of the sample, 28.4% had 65+ years and 1.9% were Aboriginal or Torres Strait Islanders.

10 **Primary and secondary outcome measures:** Annual prevalence and cumulative incidence  
11 (%) of long-term opioid prescribing (3+ prescriptions in 90 days) among patients with a MSK.  
12 Average duration of these episodes in each year between 2012 and 2018.

13 **Results:** The prevalence of long-term opioid prescribing increased from 5.5% in 2012 to 9.1%  
14 in 2018 [annual change OR=1.09 IC95% 1.08-1.09], but a slightly lower incidence was  
15 observed in 2018 [3.0% vs 3.6-3.8% in other years; annual change OR=0.99 IC95% 0.98-0.99].  
16 The incidence was between 37%-52% higher among practices located in rural Australia or  
17 lower socioeconomic areas. Individual risk factors included increasing age (3.4 times higher  
18 among those aged 80+ years than the 18-34-year group in 2012, increasing to 4.8% in 2018),  
19 identifying as Aboriginal or Torres Strait Islander (1.7-1.9 higher incidence than their peers),  
20 or living in disadvantaged areas (36%-57% more likely than among those living in wealthiest  
21 areas). Long-term opioid prescriptions lasted in average 287-301 days between 2012-2016,  
22 reducing to 229 days in 2017 and 140 days in 2018. A longer duration was observed in practices  
23 from more disadvantaged areas and females in all years, except in 2018.

24 **Conclusions:** The continued rise in the prevalence of long-term opioid prescribing is of  
25 concern, despite a recent reduction in the incidence and duration of opioid management.

26 **Keywords:** Narcotic Analgesics, Electronic Health Records, Musculoskeletal Diseases,  
27 Chronic Pain, Incidence

## 1 **ARTICLE SUMMARY**

### 2 **Strengths and limitations of this study**

- 3 • A national sample including 135,358 instances of long-term opioid prescriptions (3+ opioid  
4 prescriptions in 90 days) and 811,174 adult patients with musculoskeletal conditions from  
5 Australian general practice over seven years.
- 6 • Patients and practices from all Australian states, with different socioeconomic and  
7 demographic profiles, and from urban and rural regions are included in the study.
- 8 • The study explores the incidence and duration of long-term opioid prescriptions over time  
9 and their association with sociodemographic characteristics.
- 10 • Individuals attending multiple clinics for prescriptions are not tracked by MedicineInsight,  
11 which may underestimate the real frequency. Moreover, the findings reflect prescribing  
12 patterns rather than medication use, and the available data does not allow the investigation  
13 of the place/professional that initiated these prescriptions.

## 1 INTRODUCTION

2 Musculoskeletal conditions (MSK) represent a public health problem worldwide due to their  
3 increasing prevalence and contribution to the global burden of disability.<sup>1 2</sup> In Australia, MSK  
4 affect approximately 30% of adults (6.1 million individuals), but its prevalence is even higher  
5 in lower socioeconomic groups and the elderly.<sup>3-5</sup> In terms of health costs, MSK account for  
6 9% of the total Australian health-care expenditure, representing the fourth most expensive  
7 group of diseases in the country.<sup>6</sup>

8 MSK are among the ten most frequent problems managed by general practitioners (GPs).<sup>4</sup> The  
9 principal symptom associated with MSK and the main reason for visiting a GP is chronic pain.<sup>3-</sup>  
10 <sup>5</sup> As a consequence, MSK represent the leading cause of disability due to the impact of chronic  
11 pain on the quality of life.<sup>1 3 5-7</sup>

12 Countries such as Australia, the United States, Canada, Belgium and the United Kingdom  
13 recognise MSK and chronic pain management as a public health priority and have developed  
14 national policies aiming to improve prevention and management.<sup>1 8</sup> The strategies and actions  
15 include models of care orientated toward high-value care options for MSK pain management,  
16 as well as regular monitoring of their prevalence, patterns of medication use/prescription, and  
17 side effects related to the use of these medications.<sup>1 2 8</sup>

18 The management of chronic pain among patients with MSK can be challenging.<sup>8-14</sup> Current  
19 guidelines recommend non-pharmacological interventions as the primary initial approach for  
20 managing MSK pain. At the same time, non-steroidal anti-inflammatory drugs (NSAIDs)  
21 represent the first-line pharmacological therapy.<sup>8 12 15</sup> The use of opioids for pain management  
22 is discouraged due to the increased risk of severe side effects, especially in elderly patients or  
23 among long-term users.<sup>8-15</sup> Harmful effects associated with opioid use include sedation, falls,  
24 respiratory depression, and death, as well as an increased risk of dependence and diversion.  
25 Moreover, long-term use of opioids can potentiate chronic pain mechanisms, reducing the  
26 effect of these drugs at standard doses.<sup>8 13 15</sup>

27 Despite their recognised harmful effects, opioid use has increased in the last decades, especially  
28 among high-income countries such as the United States, Canada, the United Kingdom,  
29 Germany, Norway, Australia and New Zealand.<sup>16-20</sup> However, some of these countries have  
30 reported an apparent plateau of opioid use among patients with MSK in recent years.<sup>14 21-26</sup> In  
31 Australia, a systematic review showed a significant rise in opioid use up to 2017, mainly driven

1  
2  
3  
4  
5 1 by oxycodone.<sup>27</sup> Nonetheless, most data regarding opioid use in Australia analysed data from  
6 2 the Pharmaceutical Benefits Scheme (PBS) database.<sup>27</sup> PBS data represent an efficient and  
7  
8 3 cost-effective way to monitor dispensed medicines and trends over time<sup>28</sup>. However, studies  
9  
10 4 based on dispensed medications tend to underestimate opioid use<sup>29</sup>, the investigation of patterns  
11  
12 5 is usually restricted to age and sex distribution, and the use of aggregated data cannot  
13  
14 6 distinguish between incident users, prevalent users or long-term users.<sup>27</sup> Understanding the  
15  
16 7 determinants and patterns of long-term opioid prescription/use is fundamental to inform  
17  
18 8 stakeholders and propose targeted interventions aiming to reduce their use for MSK  
19  
20 9 management.<sup>9-11 18 27</sup> In Australia, only a few studies have examined opioid prescribing and its  
21  
22 10 association with sociodemographic characteristics at the local level but not across states or  
23  
24 11 including urban and rural areas.<sup>30 31</sup>

25  
26 12 In this sense, MedicineInsight is a national longitudinal database established in 2011 by NPS  
27  
28 13 MedicineWise to collect comprehensive, de-identified patient data from GP electronic medical  
29  
30 14 records (EMR) across Australia.<sup>32</sup> Data from MedicineInsight has previously used to assess  
31  
32 15 trends and patterns of preventive activities, medication prescriptions and laboratory requests  
33  
34 16 for acute and chronic conditions managed in Australian general practice.<sup>5 32-37</sup> This study aims  
35  
36 17 to utilise MedicineInsight data to estimate the prevalence and cumulative incidence of long-  
37  
38 18 term opioid prescription among adult patients with MSK. Furthermore, it describes trends in  
39  
40 19 opioid prescriptions between 2012-2018 and investigates associations with patient and practice  
41  
42 20 characteristics.

## 43 22 **METHODS**

### 44 23 *Study design*

45  
46  
47 24 This is an interrupted time-series study analysing data from MedicineInsight, a large general  
48  
49 25 practice database including patients from 662 general practices (8.2% of all general practices  
50  
51 26 in Australia) and over 2,700 GPs across Australia.<sup>32</sup> Although practices participating in  
52  
53 27 MedicineInsight were recruited using a non-random process, all Australian states and regions  
54  
55 28 are represented, and the database includes practices vary in size and type of services offered.  
56  
57 29 Patients in the database have been found to be comparable with the general population as  
58  
59 30 measured by sociodemographic variables and clinical conditions.<sup>5 32</sup> The information extracted  
60



1  
2  
3  
4 1 from MedicineInsight for the present study include EMR dating between 1 January 2011 and  
5 2 31 December 2018.

6  
7  
8 3 Patients within a practice have a unique identifying number which allows all the EMR held in  
9 4 the database for an individual to be linked and tracked over time. Patients' EMR are collected  
10 5 monthly, de-identified and securely transferred to NPS MedicineWise's data warehouse.  
11 6 Routinely collected information includes: demographics (gender, aboriginality, year of birth,  
12 7 patient postcode and area of residence), clinical information (diagnoses, reasons for  
13 8 consultation, immunisations), prescribed medications (generic and brand names, doses, active  
14 9 ingredient and number of repeats reasons for prescription, known allergies, drug reactions),  
15 10 pathology test results, clinical measurements (temperature, blood pressure, weight, height,  
16 11 waist circumference), and smoking status.<sup>32</sup>

### 12 *Participants*

13 To improve data quality, only practices established for at least two years before the end of the  
14 14 analysis period, with recorded data (i.e., diagnosis, reason for encounter, or reason for  
15 15 prescription) in at least 10% of clinical encounters, an average of 30 or more prescriptions per  
16 16 week and a consistent number of consultations over time (i.e. ratio between the highest and  
17 17 lowest number of annual total consultations lower than five, no gaps of more than six weeks in  
18 18 the previous two years in practice data) were included.

19 The sample included all regular patients (i.e. individuals with three or more consultations in  
20 20 any two consecutive years) aged 18 years or older (Figure 1). The sample was further restricted  
21 21 to patients with at least one recorded visit in the 12 months preceding the initial opioid  
22 22 prescription and follow-up time ended six months after the last medical encounter, in order to  
23 23 differentiate between past and current patients on opioids.<sup>21</sup> Therefore, despite data in  
24 24 MedicineInsight was available since 2011, the analyses were restricted to the period 2012-  
25 25 2018. Patients were also excluded if they had a record of cancer or neuropathic pain up to 12  
26 26 months before or six months after the start date of the initial long-term opioid prescription  
27 27 episode. Therefore, we used data from 811,174 regular adult patients with MSK attending 402  
28 28 general practices across Australia.

29 *[FIGURE 1 HERE]*

### 30 *Musculoskeletal conditions*

1  
2  
3  
4  
5 1 Data regarding MSK conditions were extracted from the database using previously published  
6  
7 2 algorithms.<sup>5</sup> The diagnosis, reason for encounter and reason for prescription fields were used  
8  
9 3 to identify patients with a potentially painful MSK condition, as these are typical fields used  
10  
11 4 by GPs to record morbidity in Australian general practice.<sup>32</sup> Most general practices use coding  
12  
13 5 systems (i.e. 'Docle', 'Pyefinch' or the International Classification of Primary Care 2), and  
14  
15 6 these were mapped to the Systematized Nomenclature of Medicine - Clinical Terms  
16  
17 7 (SNOMED-CT).<sup>5 32 38</sup> The list of MSK conditions included i) osteoarthritis, ii) osteoarthrosis,  
18  
19 8 iii) spondylarthritis, iv) fibromyalgia, v) polymyalgia rheumatica, vi) rheumatoid arthritis, vii)  
20  
21 9 psoriatic arthritis, viii) myofascial pain, ix) chronic fatigue syndrome, x) gout, xi) Paget  
22  
23 10 disease, xii) osteoporosis, xiii) tenosynovitis, xiv) chronic back pain and xv) other conditions  
24  
25 11 recorded as 'chronic musculoskeletal pain'. Synonyms and misspellings of these terms were  
26  
27 12 also used, considering that GPs can also use free-text in the completion of the diagnosis. The  
28  
29 13 data extraction algorithms used in this study are available from the authors by request.

#### 14 *Prescription data*

15  
16 Data regarding opioid prescriptions (i.e. codeine, tramadol, tapentadol, oxycodone, morphine,  
17  
18 fentanyl, buprenorphine, hydromorphone) were extracted from the prescription dataset using  
19  
20 generic and brand names.<sup>39</sup> Using recommendations from the literature,<sup>21 40</sup> a new 'episode of  
21  
22 opioid prescription' was defined as a prescription provided to the patient where no opioid was  
23  
24 prescribed within six months from the 'end of the last episode'. The 'end date' of an 'episode  
25  
26 of opioid prescription' was considered as being 28 days after the last prescription was provided  
27  
28 (i.e. in Australia, opioids can be prescribed for up to 28 days without repeats).<sup>8 39</sup> An episode  
29  
30 of 'long-term opioid prescription' was defined as patients receiving i) three or more scripts  
31  
32 (including the initiating script) within 90 days of the initial script or ii) a total of 10 or more  
consecutive scripts with an interval lower than 180 between 'episodes of opioid prescription',  
even though the first three were not provided within 90 days. An episode of 'long-term opioid  
prescription' ended when the patient had not received a prescription for opioids for six or more  
months.<sup>8 39</sup> A total of 135,358 instances of long-term opioid prescriptions were identified over  
the period (Figure 1), with 88% of them matching a consultation when the GP recorded a MSK  
as the reason for diagnosis, reason for encounter and/or reason for prescription (i.e. excluding  
cancer or neuropathic pain) within a period lasting from 30 days before the initial opioid  
prescription, or up to 120 days after it.<sup>8 39</sup>

#### 32 *Data analysis*

1  
2  
3  
4  
5 1 The prevalence of long-term opioid prescriptions was estimated as the percentage of regular  
6 2 patients with MSK attending the practice that year that were on opioids (i.e. long-term opioid  
7 3 prescription), either because these prescriptions started in that year or previous years. The  
8 4 cumulative incidence of long-term opioid prescription was estimated as the percentage of  
9 5 regular patients with MSK in any year between 2012 and 2018 starting opioids that year (i.e.  
10 6 patients “at risk” not on opioids). The average annual change in the prevalence or incidence of  
11 7 long term opioid prescription was investigated using logistic regression, and the results  
12 8 expressed as odds ratios (OR) with their respective 95% confidence intervals (95% CI).

13  
14  
15  
16  
17  
18  
19 9 The association between sociodemographic characteristics and the incidence of long-term  
20 10 opioid prescription was also explored using logistic regression, and the variables were included  
21 11 in the models considering two hierarchical levels. The first level included practice  
22 12 characteristics: state, rurality (i.e. major cities, inner regional, or outer regional/remote  
23 13 Australia) and the practice’s Index of Relative Socioeconomic Advantage and Disadvantage  
24 14 [IRSAD, as provided by MedicineInsight (based on the postcode of the practice) and divided  
25 15 in quintiles]. IRSAD is a relative indicator of economic and social advantage/disadvantage of  
26 16 people and households within an area generated by the Australian Bureau of Statistics and  
27 17 based on a range of census variables.<sup>41</sup> Higher IRSAD scores indicate that the practice is  
28 18 located in a more advantaged area. The second level included patient characteristics: gender  
29 19 (males/females), age in groups (18-34, 35-49, 50-64, 65-79, 80+ years), aboriginality  
30 20 (Aboriginal or Torres Strait Islander: No, Yes, not recorded), and the patient’s IRSAD (divided  
31 21 in quintiles).

32  
33  
34  
35  
36  
37  
38  
39  
40  
41  
42 22 Results of the logistic regression models were expressed as marginal predicted probabilities  
43 23 (i.e. adjusted cumulative incidence) instead of odds ratio to facilitate interpretation of the  
44 24 results, as many medical doctors, researchers and health policymakers are not familiar with  
45 25 these measures of association.<sup>42</sup> Wald tests for heterogeneity or trend were used to estimate the  
46 26 p-values due to the use of clustered data (i.e. practice defined as the cluster).

47  
48  
49  
50  
51 27 Quantile regression models were used to investigate the variables associated with the median  
52 28 duration (in days) of the long-term opioid prescription among incident cases, considering the  
53 29 same levels of adjustment as above.

54  
55  
56  
57 30 All analyses were performed using the statistical software STATA 15.0 (StataCorp, Texas,  
58 31 USA) and conditioned to the patient’s probability of being in the sample to minimise selection  
59  
60

1 bias (i.e. the likelihood of receiving medical treatments or diagnosis increase with the number  
2 of visits to the practice).<sup>43</sup>

### 3 *Ethics approval*

4 The Human Research Ethics Committee of the University of Adelaide exempted this study of  
5 an ethical review as only non-identifiable data was used. Access to the data for this study was  
6 approved by the MedicineInsight Data Governance Committee (project 2016–004 and 2019-  
7 029).

### 8 *Patient and public involvement*

9 Patients or the public were involved in the design, or conduct, or reporting, or dissemination  
10 plans of our research. The provision of information for the study underwent a formal approval  
11 process guided by the MedicineInsight independent external Data Governance Committee that  
12 includes GPs, consumer advocates, privacy experts and researchers. Moreover, two of the  
13 authors are active GPs regularly attending patients affected by MSK, which also supported the  
14 design of the study.

## 15 **RESULTS**

16 The sample consisted of 811,174 unique regular adult patients with MSK attending one of the  
17 MedicineInsight practices between 2012 and 2018 (Figure 1). The total number of regular  
18 patients with MSK per year is shown in Figure 2. The sample ranged between 160,834 and  
19 299,431 over the period.

20 The overall ‘prevalence’ of long-term opioid prescribing (i.e. patients with MSK on opioids,  
21 either because they started that year or in previous years) increased from 5.5% in 2012 to 9.1%  
22 in 2018 [annual change OR=1.09 IC95% 1.08-1.09; p-value for trend <0.001]. Figure 2 shows  
23 the increase was related to a higher proportion of patients starting opioids in previous years,  
24 rather than a rise in incident cases (i.e. those who started opioids in that year).

25 *[FIGURE 2 HERE]*

26 Table 1 shows males represented 44.5% of the sample, 28.4% had 65+ years, and 1.9% were  
27 Aboriginal or Torres Strait Islanders. Individuals from different socioeconomic settings were  
28 all represented in the study, and 40.0% were for regional or remote areas. The cumulative  
29 incidence of long-term opioid prescription (i.e. excluding those who were already on opioids)

1  
2  
3  
4  
5 1 among regular patients with a MSK ranged between 3.6% and 3.8% between 2012-2016,  
6  
7 2 dropping to 3.0% in 2018 [3.0%; annual change OR=0.99 IC95% 0.98-0.99; p-value for trend  
8  
9 3 0.002].

10  
11 4 The same table also shows the sociodemographic factors associated with the cumulative  
12  
13 5 incidence of long-term opioid prescribing. In any investigated year, the cumulative incidence  
14  
15 6 was 37%-52% higher among individuals attending practices located in rural Australia or areas  
16  
17 7 with a very low IRSAD, compared to those attending practices located in major cities or areas  
18  
19 8 with a higher IRSAD. Individual risk factors associated with a higher incidence of long-term  
20  
21 9 opioid prescribing included increasing age (3.4 times higher among those aged 80+ years than  
22  
23 10 the 18-34-year group in 2012, increasing to 4.8% in 2018), identifying as an Aboriginal or  
24  
25 11 Torres Strait Islander (1.7-1.9 higher incidence than their peers), or living in areas with a lower  
26  
27 12 IRSAD (36%-57% more likely than among those living in wealthiest areas). Neither the state  
28  
29 13 where the practice was located nor the patient's gender was associated with this outcome.

30  
31 14 [TABLE 1 HERE]

32  
33 15 The average duration of the long-term opioid prescriptions among incident cases ranged from  
34  
35 16 287 to 301 days between 2012-2016, reducing to 229 days in 2017 and 140 days in 2018 (Table  
36  
37 17 2). The most consistent pattern observed over the investigated years was an increased duration  
38  
39 18 of prescribing among individuals attending practices located in lower socioeconomic areas (i.e.  
40  
41 19 up to 152 days longer than those attending practices located in the wealthiest areas) or females  
42  
43 20 (i.e. up to 77 days longer than in males). However, these differences were not evident in 2018.

44  
45 21 [TABLE 2 HERE]

## 46 47 22 **DISCUSSION**

48  
49 23 To the best of our knowledge, this is the first Australian study that uses EMR from a national  
50  
51 24 general practice database to investigate patterns of long-term opioid prescriptions for patients  
52  
53 25 with MSK.<sup>27</sup> Three main findings can be highlighted from the results. Firstly, the overall  
54  
55 26 prevalence of long-term opioid prescriptions increased between 2012 and 2018 as a  
56  
57 27 consequence of the progressive rise of patients starting opioids in previous years rather than  
58  
59 28 for an upsurge of incident cases. Secondly, factors associated with a higher incidence of long-  
60  
30 29 term opioid prescription included increasing age, identifying as Aboriginal or Torres Strait  
Islander, living in a lower socioeconomic area, or attending practices located in a rural setting

1  
2  
3  
4  
5 1 or more disadvantaged areas. Finally, a longer duration of these episodes was observed among  
6  
7 2 females or patients attending practices in lower socioeconomic areas.

8  
9 3 The increase in the prevalence of long-term opioid prescriptions is consistent with other  
10  
11 4 Australian studies using PBS data (9, 22).<sup>9 20 27</sup> Some authors suggest the increase in opioid  
12  
13 5 use/prescription is related to the ageing population with higher rates of MSK, availability of  
14  
15 6 slow-release opioid formulations and aggressive marketing of opioids by pharmaceutical  
16  
17 7 companies.<sup>1 2 21</sup> Moreover, the observed increase in Australia is probably related to the  
18  
19 8 prescription of potent opioids. A previous study using PBS data found that between 2006-2015  
20  
21 9 weaker opioid use remained stable or declined, while there was a 238% increase in persons  
22  
23 10 dispensed only strong opioids.<sup>20</sup> Nonetheless, there is evidence that long-term opioid  
24  
25 11 prescription for patients with MSK in the UK and North America reached a plateau around  
26  
27 12 2009-2011.<sup>21 22 44</sup>

28  
29 13 Previous studies have also reported the incidence of opioid use has either decreased or  
30  
31 14 remained unchanged in recent years, despite a rise in the prevalence.<sup>45-47</sup> In consonance with  
32  
33 15 these studies, we found a steady incidence between 2012-2016, followed by a lower incidence  
34  
35 16 in 2018. Interestingly, the duration of long-term opioid prescription also declined in newly  
36  
37 17 incident cases in 2017 and 2018 compared to the previous five years. Although results for  
38  
39 18 2018 might reflect an insufficient follow-up of incident cases in that year, it would not explain  
40  
41 19 the findings observed in 2017. Recent education strategies among GPs and health policy  
42  
43 20 changes may have helped reduced opioid initiation and duration when prescribing to someone  
44  
45 21 affected by MSK.<sup>8 13 15 39</sup> However, the increasing prevalence between 2012-2018 with an  
46  
47 22 upsurging number of patients starting opioids in previous years (i.e. 'prevalent' cases) may  
48  
49 23 suggest insufficient pro-active opioid de-prescribing is being undertaken. Factors such as  
50  
51 24 limited time of clinicians, insufficient training on de-prescribing, or restricted access to  
52  
53 25 resources for monitoring patients using opioids are recognised barriers that affect strategies  
54  
55 26 aiming to improve opioid prescription practices in primary care.<sup>48</sup>

56  
57 27 Our finding that the elderly, patients living in lower socioeconomic areas, attending practices  
58  
59 28 located in more disadvantaged settings or from rural and remote Australia have higher rates of  
60  
1 long-term opioid prescription is consistent with British and American studies,<sup>21 22 49</sup> as well as  
2 with results based on PBS data.<sup>9 30 31</sup> These groups are also more likely to be affected by chronic  
3 MSK conditions<sup>5 21</sup>. Perhaps a maldistribution of support services or access to tertiary based

1  
2  
3  
4  
5 1 pain clinics could partially explain these differences<sup>48</sup>, but further studies would be necessary  
6  
7 2 to investigate the underlying causes in the Australian context.

### 8 9 3 **Strengths and limitations**

10  
11 4 The study has significant strengths: a national sample including adult patients of all age groups,  
12  
13 5 ethnicity, or sex, and practices from all Australian states, socioeconomic areas, or remoteness.  
14  
15 6 Despite the novelty in the use of a national general practice database that allows the  
16  
17 7 identification of patients with MSK and the reason for opioid prescription, differentiates  
18  
19 8 between incident and prevalent cases, and provides data on different associated factors, some  
20  
21 9 limitations have to be recognised. First, our study did not distinguish between the strength of  
22  
23 10 preparations (i.e. presented as either morphine equivalent doses or defined daily dose).  
24  
25 11 However, previous studies found that up to 40% of the dispensed pain medications for non-  
26  
27 12 cancer pain are potent opioids, and their use has increased over the years.<sup>14 17 20</sup> Second,  
28  
29 13 individuals attending multiple clinics for prescriptions are not tracked by MedicineInsight, and  
30  
31 14 this may underestimate the real frequency of long-term opioid prescriptions. However, the  
32  
33 15 observed trends and associations are consistent with the available literature.<sup>9 20-22 27 44</sup> Third,  
34  
35 16 the place/professional that initiated the prescriptions (e.g. Emergency Department, hospital,  
36  
37 17 private specialist) cannot be investigated. Nonetheless, according to PBS data, half of the  
38  
39 18 opioids prescribed in Australia are initiated by general practitioners<sup>17</sup> and most patients with  
40  
41 19 chronic pain requiring long-term opioid prescriptions are managed in primary care settings.<sup>48</sup>  
42  
43 20 Finally, medicine-use information from MedicineInsight relates to records of GP prescribing,  
44  
45 21 and not all prescriptions and repeats will be dispensed or taken by the patient. Therefore, results  
46  
47 22 from this study reflect prescription patterns rather than opioid use.

### 48 49 23 **CONCLUSION**

50  
51 24 The overall prevalence of long-term opioid prescribing for MSK conditions has increased in  
52  
53 25 Australia between 2012 and 2018, despite a lower incidence and duration of these prescriptions  
54  
55 26 in the last couple of years. This trend towards an increase in the prevalence of long-term opioid  
56  
57 27 prescribing is of great concern, as current literature reports an overall escalation in the rates of  
58  
59 28 opioid harms and deaths.<sup>8 9 13 15</sup> Our study highlights the need for ongoing efforts to reduce the  
60  
61 29 opioid burden, especially among those living and attending practices in more disadvantaged  
62  
63 30 areas and considering the higher risk of adverse effect in elderly patients. This should come  
64  
65 31 not only by reducing opioid initiation but also by proactively de-prescribing for suitable  
66  
67 32

1  
2  
3  
4 1 patients.<sup>8 13</sup> While GPs are in an optimal position for this role<sup>48</sup>, opioid stewardship is the  
5  
6 2 responsibility of all prescribing medical practitioners and allied health professionals dealing  
7  
8 3 with MSK pain management.  
9

10 4  
11  
12  
13  
14  
15  
16  
17  
18  
19  
20  
21  
22  
23  
24  
25  
26  
27  
28  
29  
30  
31  
32  
33  
34  
35  
36  
37  
38  
39  
40  
41  
42  
43  
44  
45  
46  
47  
48  
49  
50  
51  
52  
53  
54  
55  
56  
57  
58  
59  
60

For peer review only



1  
2  
3  
4  
5 16  
7 **2 ACKNOWLEDGEMENTS**8  
9 3 The authors acknowledge NPS MedicineWise for their support in the development of this  
10 4 research.11  
12  
13 **5 AUTHOR CONTRIBUTIONS**14  
15 6 All authors made significant contributions to the manuscript and are responsible for its content.  
16 7 NS and SBT conceived the idea and planned this study. DGC was responsible for data  
17 8 extraction and analysis, interpreting and presenting the results. SBT and DGC wrote the first  
18 9 draft and the revisions. NS contributed to the manuscript refinement. All authors have read and  
19 10 approved the final manuscript.20  
21  
22 **11 FUNDING**23  
24 12 This research received no specific grant from any funding agency in the public, commercial or  
25 13 not-for-profit sectors.26  
27  
28 **14 COMPETING INTERESTS**29  
30 15 None declared.31  
32  
33 **16 ETHICS APPROVAL**34  
35 17 The Human Research Ethics Committee of the University of Adelaide exempted this study of  
36 18 an ethical review as only non-identifiable data was used. Access to the data for this study was  
37 19 approved by the MedicineInsight Data Governance Committee (project 2016–004 and 2019-  
38 20 029).39  
40  
41 **21 DATA SHARING STATEMENT**42  
43 22 No additional data are available, as the original dataset belongs to a third party.  
44  
45  
46  
47  
48  
49  
50  
51  
52  
53  
54  
55  
56  
57  
58  
59  
60

## References

1. Blyth FM, Briggs AM, Schneider CH, et al. The Global Burden of Musculoskeletal Pain-Where to From Here? *Am J Public Health* 2019;109(1):35-40. doi: 10.2105/AJPH.2018.304747 [published Online First: 2018/11/30]
2. Briggs AM, Shiffman J, Shawar YR, et al. Global health policy in the 21st century: Challenges and opportunities to arrest the global disability burden from musculoskeletal health conditions. *Best Pract Res Clin Rheumatol* 2020;101549. doi: 10.1016/j.berh.2020.101549 [published Online First: 2020/07/28]
3. Australian Institute of Health and Welfare. Arthritis and other musculoskeletal conditions across the life stages. Canberra: AIHW; 2014. [cited 2019 Sep 20]. Available from: <http://www.aihw.gov.au/publication-detail/?id=60129547059>
4. Cooke G, Valenti L, Glasziou P, et al. Common general practice presentations and publication frequency. *Aust Fam Physician* 2013;42(1-2):65-8. [published Online First: 2013/03/27]
5. Gonzalez-Chica DA, Vanlint S, Hoon E, et al. Epidemiology of arthritis, chronic back pain, gout, osteoporosis, spondyloarthropathies and rheumatoid arthritis among 1.5 million patients in Australian general practice: NPS MedicineWise MedicineInsight dataset. *BMC Musculoskelet Disord* 2018;19(1):20. doi: 10.1186/s12891-018-1941-x [published Online First: 2018/01/20]
6. Australian Institute of Health and Welfare. Health-care expenditure on arthritis and other musculoskeletal conditions 2008–09. Canberra: AIHW; 2014. [cited 2019 Sep 13]. Available from: <http://www.aihw.gov.au/publication-detail/?id=60129548392>.
7. Gonzalez-Chica DA, Hill CL, Gill TK, et al. Individual diseases or clustering of health conditions? Association between multiple chronic diseases and health-related quality of life in adults. *Health Qual Life Outcomes* 2017;15(1):244. doi: 10.1186/s12955-017-0806-6 [published Online First: 2017/12/23]
8. Pain Australia. National Pain Strategy, Pain Management for all Australians, Australia.: Pain Australia; 2014. [cited 2019 Aug 16]. Available from: <http://www.painaustralia.org.au/improving-policy/national-pain-strategy>.
9. Australian Institute of Health and Welfare. Opioid harm in Australia: and comparisons between Australia and Canada. Canberra: AIHW; 2018. [cited 2020 Jun 05]. Available from: <https://www.aihw.gov.au/reports/illicit-use-of-drugs/opioid-harm-in-australia/contents/table-of-contents>.
10. Bohnert AS, Valenstein M, Bair MJ, et al. Association between opioid prescribing patterns and opioid overdose-related deaths. *JAMA* 2011;305(13):1315-21. doi: 10.1001/jama.2011.370 [published Online First: 2011/04/07]
11. Ray WA, Chung CP, Murray KT, et al. Prescription of Long-Acting Opioids and Mortality in Patients With Chronic Noncancer Pain. *JAMA* 2016;315(22):2415-23. doi: 10.1001/jama.2016.7789 [published Online First: 2016/06/15]

- 1  
2  
3  
4  
5  
6  
7  
8  
9  
10  
11  
12  
13  
14  
15  
16  
17  
18  
19  
20  
21  
22  
23  
24  
25  
26  
27  
28  
29  
30  
31  
32  
33  
34  
35  
36  
37  
38  
39  
40  
41  
42  
43  
44  
45  
46  
47  
48  
49  
50  
51  
52  
53  
54  
55  
56  
57  
58  
59  
60
- 1 12. Krebs EE, Gravely A, Nugent S, et al. Effect of Opioid vs Nonopioid Medications on Pain-Related  
2 Function in Patients With Chronic Back Pain or Hip or Knee Osteoarthritis Pain: The SPACE  
3 Randomized Clinical Trial. *JAMA* 2018;319(9):872-82. doi: 10.1001/jama.2018.0899 [published  
4 Online First: 2018/03/07]
- 5 13. Dowell D, Haegerich TM, Chou R. CDC Guideline for Prescribing Opioids for Chronic Pain —  
6 United States, 2016. *MMWR Recomm Rep* 2016;65(No. RR-1):1–49; 2016. [cited 2020 Mar 05].  
7 Available from <http://dx.doi.org/10.15585/mmwr.rr6501e1>.
- 8 14. Ashaye T, Hounsome N, Carnes D, et al. Opioid prescribing for chronic musculoskeletal pain in  
9 UK primary care: results from a cohort analysis of the COPERS trial. *BMJ Open* 2018;8(6):e019491.  
10 doi: 10.1136/bmjopen-2017-019491 [published Online First: 2018/06/09]
- 11 15. The Royal Australian College of General Practitioners. Guideline for the management of knee and  
12 hip osteoarthritis. 2nd edn. East Melbourne, Vic: RACGP; 2018. [cited 2020 Apr 03]. Available from:  
13 [https://www.racgp.org.au/download/Documents/Guidelines/Musculoskeletal/guideline-for-the-](https://www.racgp.org.au/download/Documents/Guidelines/Musculoskeletal/guideline-for-the-management-of-knee-and-hip-0a-2nd-edition.pdf)  
14 [management-of-knee-and-hip-0a-2nd-edition.pdf](https://www.racgp.org.au/download/Documents/Guidelines/Musculoskeletal/guideline-for-the-management-of-knee-and-hip-0a-2nd-edition.pdf).
- 15 16. La Frenais FL, Bedder R, Vickerstaff V, et al. Temporal Trends in Analgesic Use in Long-Term  
16 Care Facilities: A Systematic Review of International Prescribing. *J Am Geriatr Soc* 2018;66(2):376-  
17 82. doi: 10.1111/jgs.15238 [published Online First: 2017/12/24]
- 18 17. Lalic S, Ilomaki J, Bell JS, et al. Prevalence and incidence of prescription opioid analgesic use in  
19 Australia. *Br J Clin Pharmacol* 2019;85(1):202-15. doi: 10.1111/bcp.13792 [published Online First:  
20 2018/10/20]
- 21 18. Manchikanti L, Sanapati J, Benyamin RM, et al. Reframing the Prevention Strategies of the Opioid  
22 Crisis: Focusing on Prescription Opioids, Fentanyl, and Heroin Epidemic. *Pain Physician*  
23 2018;21(4):309-26. [published Online First: 2018/07/27]
- 24 19. Shipton EA, Shipton EE, Shipton AJ. A Review of the Opioid Epidemic: What Do We Do About  
25 It? *Pain Ther* 2018;7(1):23-36. doi: 10.1007/s40122-018-0096-7 [published Online First: 2018/04/07]
- 26 20. Karanges EA, Buckley NA, Brett J, et al. Trends in opioid utilisation in Australia, 2006-2015:  
27 Insights from multiple metrics. *Pharmacoepidemiol Drug Saf* 2018;27(5):504-12. doi:  
28 10.1002/pds.4369 [published Online First: 2017/12/28]
- 29 21. Bedson J, Chen Y, Hayward RA, et al. Trends in long-term opioid prescribing in primary care  
30 patients with musculoskeletal conditions: an observational database study. *Pain* 2016;157(7):1525-31.  
31 doi: 10.1097/j.pain.0000000000000557 [published Online First: 2016/03/24]
- 32 22. Curtis JR, Xie F, Smith C, et al. Changing Trends in Opioid Use Among Patients With Rheumatoid  
33 Arthritis in the United States. *Arthritis Rheumatol* 2017;69(9):1733-40. doi: 10.1002/art.40152  
34 [published Online First: 2017/06/22]

- 1  
2  
3  
4 1 23. Fernandes K, Martins D, Juurlink D, et al. High-Dose Opioid Prescribing and Opioid-Related  
5 2 Hospitalization: A Population-Based Study. *PLoS One* 2016;11(12):e0167479. doi:  
6 3 10.1371/journal.pone.0167479 [published Online First: 2016/12/16]  
7  
8 4 24. Larochelle MR, Zhang F, Ross-Degnan D, et al. Trends in opioid prescribing and co-prescribing of  
9 5 sedative hypnotics for acute and chronic musculoskeletal pain: 2001-2010. *Pharmacoepidemiol Drug*  
10 6 *Saf* 2015;24(8):885-92. doi: 10.1002/pds.3776 [published Online First: 2015/04/25]  
11 7  
12 25. Steinman MA, Komaiko KD, Fung KZ, et al. Use of opioids and other analgesics by older adults in  
13 8 the United States, 1999-2010. *Pain Med* 2015;16(2):319-27. doi: 10.1111/pme.12613 [published Online  
14 9 First: 2014/10/30]  
15  
16 26. Woodard D, Van Demark RE, Jr. The Opioid Epidemic in 2017: Are We Making Progress? *S D*  
17 10 *Med* 2017;70(10):467-71. [published Online First: 2017/09/29]  
18  
19 27. Donovan PJ, Arroyo D, Pattullo C, et al. Trends in opioid prescribing in Australia: a systematic  
20 11 review. *Aust Health Rev* 2020;44(2):277-87. doi: 10.1071/AH18245 [published Online First:  
21 12 2020/04/04]  
22 13  
23 28. Hollingworth SA, Symons M, Khatun M, et al. Prescribing databases can be used to monitor trends  
24 14 in opioid analgesic prescribing in Australia. *Aust N Z J Public Health* 2013;37(2):132-8. doi:  
25 15 10.1111/1753-6405.12030 [published Online First: 2013/04/05]  
26 16  
27 29. Gisev N, Pearson SA, Karanges EA, et al. To what extent do data from pharmaceutical claims under-  
28 17 estimate opioid analgesic utilisation in Australia? *Pharmacoepidemiol Drug Saf* 2018;27(5):550-55.  
29 18 doi: 10.1002/pds.4329 [published Online First: 2017/10/20]  
30 19  
31 30. Islam MM, McRae IS, Mazumdar S, et al. Prescription opioid dispensing in New South Wales,  
32 20 Australia: spatial and temporal variation. *BMC Pharmacol Toxicol* 2018;19(1):30. doi:  
33 21 10.1186/s40360-018-0219-0 [published Online First: 2018/06/20]  
34 22  
35 31. Islam MM, Wollersheim D. Variation in Prescription Opioid Dispensing across Neighborhoods of  
36 23 Diverse Socioeconomic Disadvantages in Victoria, Australia. *Pharmaceuticals (Basel)* 2018;11(4) doi:  
37 24 10.3390/ph11040116 [published Online First: 2018/11/06]  
38 25  
39 32. Busingye D, Gianacas C, Pollack A, et al. Data Resource Profile: MedicineInsight, an Australian  
40 26 national primary health care database. *Int J Epidemiol* 2019;48(6):1741-41h. doi: 10.1093/ije/dyz147  
41 27 [published Online First: 2019/07/12]  
42 28  
43 33. Badmus D, Menzies R. Using general practice data to monitor influenza vaccination coverage in  
44 29 the medically at risk: a data linkage study. *BMJ Open* 2019;9(9):e031802. doi: 10.1136/bmjopen-2019-  
45 30 031802 [published Online First: 2019/09/19]  
46 31  
47 34. Bernardo CO, Gonzalez-Chica D, Stocks N. Influenza-like illness and antimicrobial prescribing in  
48 32 Australian general practice from 2015 to 2017: a national longitudinal study using the MedicineInsight  
49 33 dataset. *BMJ Open* 2019;9(4):e026396. doi: 10.1136/bmjopen-2018-026396 [published Online First:  
50 34 2019/05/03]  
51 35  
52 36  
53  
54  
55  
56  
57  
58  
59  
60

- 1  
2  
3  
4  
5 1 35. Gonzalez-Chica D, Stocks N. Changes to the frequency and appropriateness of vitamin D testing  
6 2 after the introduction of new Medicare criteria for rebates in Australian general practice: evidence from  
7 3 1.5 million patients in the NPS MedicineInsight database. *BMJ Open* 2019;9(3):e024797. doi:  
8 4 10.1136/bmjopen-2018-024797 [published Online First: 2019/03/11]  
9  
10 5 36. Khanam MA, Kitsos A, Stankovich J, et al. Chronic kidney disease monitoring in Australian general  
11 6 practice. *Aust J Gen Pract* 2019;48(3):132-37. doi: 10.31128/AJGP-07-18-4630 [published Online  
12 7 First: 2019/07/01]  
13  
14 8 37. Lee CMY, Mnatzaganian G, Woodward M, et al. Sex disparities in the management of coronary  
15 9 heart disease in general practices in Australia. *Heart* 2019;105(24):1898-904. doi: 10.1136/heartjnl-  
16 10 2019-315134 [published Online First: 2019/07/25]  
17  
18 11 38. SNOMED International. SNOMED CT; 2020. [cited 2020 Jun 13] Available from:  
19 12 <http://www.snomed.org/>.  
20  
21 13 39. Australian Department of Health. The Pharmaceutical Benefits Scheme. TGA Prescription Opioid  
22 14 Regulatory Reforms. Canberra; 2019. [cited 2020 Jan 30]. Available from:  
23 15 [https://www.pbs.gov.au/info/industry/listing/elements/pbac-meetings/psd/2019-12/tga-prescription-](https://www.pbs.gov.au/info/industry/listing/elements/pbac-meetings/psd/2019-12/tga-prescription-opioid-regulatory-reforms)  
24 16 [opioid-regulatory-reforms](https://www.pbs.gov.au/info/industry/listing/elements/pbac-meetings/psd/2019-12/tga-prescription-opioid-regulatory-reforms).  
25  
26 17 40. Dunn KM, Saunders KW, Rutter CM, et al. Opioid prescriptions for chronic pain and overdose: a  
27 18 cohort study. *Ann Intern Med* 2010;152(2):85-92. doi: 10.7326/0003-4819-152-2-201001190-00006  
28 19 [published Online First: 2010/01/20]  
29  
30 20 41. Australian Bureau of Statistics. Census of Population and Housing: Socio-Economic Indexes for  
31 21 Areas (SEIFA), Australia. Cat. No. 2033.0.55.001. Canberra; 2018. [cited 2019 May 03]. Available  
32 22 from: <http://www.abs.gov.au/ausstats/abs@.nsf/mf/2033.0.55.001>.  
33  
34 23 42. Tajeu GS, Sen B, Allison DB, et al. Misuse of odds ratios in obesity literature: an empirical analysis  
35 24 of published studies. *Obesity (Silver Spring)* 2012;20(8):1726-31. doi: 10.1038/oby.2012.71 [published  
36 25 Online First: 2012/03/23]  
37  
38 26 43. Goldstein BA, Bhavsar NA, Phelan M, et al. Controlling for Informed Presence Bias Due to the  
39 27 Number of Health Encounters in an Electronic Health Record. *Am J Epidemiol* 2016;184(11):847-55.  
40 28 doi: 10.1093/aje/kww112 [published Online First: 2016/11/18]  
41  
42 29 44. Han L, Allore H, Goulet J, et al. Opioid dosing trends over eight years among US Veterans with  
43 30 musculoskeletal disorders after returning from service in support of recent conflicts. *Ann Epidemiol*  
44 31 2017;27(9):563-69 e3. doi: 10.1016/j.annepidem.2017.08.015 [published Online First: 2017/09/12]  
45  
46 32 45. Fassio V, Aspinall SL, Zhao X, et al. Trends in opioid and nonsteroidal anti-inflammatory use and  
47 33 adverse events. *Am J Manag Care* 2018;24(3):e61-e72. [published Online First: 2018/03/20]  
48  
49 34 46. Mosher HJ, Krebs EE, Carrel M, et al. Trends in prevalent and incident opioid receipt: an  
50 35 observational study in Veterans Health Administration 2004-2012. *J Gen Intern Med* 2015;30(5):597-  
51 36 604. doi: 10.1007/s11606-014-3143-z [published Online First: 2014/12/19]

- 1  
2  
3  
4 1 47. Smolina K, Gladstone EJ, Rutherford K, et al. Patterns and trends in long-term opioid use for non-  
5 2 cancer pain in British Columbia, 2005-2012. *Can J Public Health* 2016;107(4-5):e404-e09. doi:  
6 3 10.17269/cjph.107.5413 [published Online First: 2016/12/28]  
7  
8 4 48. Cheatle MD, Barker C. Improving opioid prescription practices and reducing patient risk in the  
9 5 primary care setting. *J Pain Res* 2014;7:301-11. doi: 10.2147/jpr.S37306 [published Online First:  
10 6 2014/06/27]  
11 7 49. Mordecai L, Reynolds C, Donaldson LJ, et al. Patterns of regional variation of opioid prescribing  
12 8 in primary care in England: a retrospective observational study. *Br J Gen Pract* 2018;68(668):e225-  
13 9 e33. doi: 10.3399/bjgp18X695057 [published Online First: 2018/02/15]  
14  
15  
16  
17  
18  
19  
20  
21  
22  
23  
24  
25  
26  
27  
28  
29  
30  
31  
32  
33  
34  
35  
36  
37  
38  
39  
40  
41  
42  
43  
44  
45  
46  
47  
48  
49  
50  
51  
52  
53  
54  
55  
56  
57  
58  
59  
60

**Table 1. Cumulative incidence of long-term opioid prescription for the management of musculoskeletal conditions according to practice and patient's characteristics. regular patients<sup>a</sup> aged 18+ years. Australia, 2012-2018.**

| Long-term opioids - incidence (%)                        |                |           |           |           |           |           |           |     |
|----------------------------------------------------------|----------------|-----------|-----------|-----------|-----------|-----------|-----------|-----|
| Year                                                     | 2012           | 2013      | 2014      | 2015      | 2016      | 2017      | 2018      |     |
| <b>regular patients with a MSK 'at risk'<sup>a</sup></b> | 157,528        | 185,358   | 210,089   | 231,961   | 253,648   | 281,655   | 190,079   |     |
|                                                          | 3.6            | 3.6       | 3.8       | 3.7       | 3.8       | 3.5       | 3.0       |     |
| <b>Overall incidence - % (95%CI)</b>                     | (3.4;3.8)      | (3.4;3.8) | (3.6;4.0) | (3.5;3.9) | (3.6;4.0) | (3.4;3.7) | (2.8;3.1) |     |
| <b>Practice characteristics<sup>c</sup></b>              | % <sup>d</sup> |           |           |           |           |           |           |     |
| <b>State</b>                                             |                |           |           |           |           |           |           |     |
| NSW                                                      | 36.2           | 3.6       | 3.5       | 3.8       | 3.7       | 3.7       | 3.4       | 2.8 |
| VIC                                                      | 21.5           | 3.7       | 3.6       | 3.9       | 3.9       | 3.9       | 3.7       | 3.1 |
| QLD                                                      | 14.3           | 3.3       | 3.5       | 3.8       | 3.6       | 3.5       | 3.6       | 2.7 |
| WA                                                       | 11.3           | 3.7       | 3.8       | 3.9       | 3.8       | 4.3       | 4.1       | 3.5 |
| TAS                                                      | 10.4           | 3.3       | 3.3       | 3.4       | 3.4       | 3.4       | 3.1       | 2.8 |
| SA                                                       | 3.0            | 3.2       | 3.8       | 3.2       | 3.9       | 3.7       | 3.8       | 2.9 |
| ACT                                                      | 2.7            | 6.0       | 4.6       | 5.1       | 4.8       | 4.2       | 4.5       | 3.3 |
| NT                                                       | 0.6            | 2.6       | 3.6       | 3.5       | 2.5       | 3.7       | 2.6       | 2.6 |
| <b>Rurality</b>                                          |                |           |           |           |           |           |           |     |
| Major cities                                             | 60.0           | 3.1       | 3.2       | 3.4       | 3.4       | 3.3       | 3.2       | 2.7 |
| Inner regional                                           | 26.7           | 3.8       | 4.0       | 4.0       | 3.9       | 4.1       | 3.9       | 3.2 |
| Outer regional/Remote                                    | 13.3           | 4.9       | 4.5       | 5.0       | 4.8       | 5.0       | 4.5       | 3.7 |
| <b>IRSAD Quintile</b>                                    |                |           |           |           |           |           |           |     |
| Very high                                                | 25.8           | 2.8       | 2.9       | 3.1       | 2.9       | 3.1       | 2.8       | 2.4 |
| High                                                     | 16.7           | 3.4       | 3.4       | 3.4       | 3.4       | 3.6       | 3.4       | 3.0 |
| Middle                                                   | 22.8           | 3.8       | 3.6       | 3.9       | 4.0       | 4.0       | 3.9       | 3.1 |
| Low                                                      | 15.6           | 3.8       | 3.7       | 4.0       | 4.0       | 3.8       | 3.6       | 3.0 |
| Very Low                                                 | 19.1           | 4.0       | 4.3       | 4.5       | 4.4       | 4.4       | 4.1       | 3.3 |
| <b>Patient's characteristics<sup>e</sup></b>             |                |           |           |           |           |           |           |     |
| <b>Gender</b>                                            |                |           |           |           |           |           |           |     |
| Male                                                     | 44.5           | 3.4       | 3.4       | 3.6       | 3.7       | 3.7       | 3.4       | 3.0 |

|                                          |      |            |            |            |            |            |            |            |
|------------------------------------------|------|------------|------------|------------|------------|------------|------------|------------|
| Female                                   | 55.5 | 3.7        | 3.7        | 3.9        | 3.8        | 3.8        | 3.6        | 2.9        |
| <b>Age</b>                               |      |            |            |            |            |            |            |            |
| 18-34 years                              | 18.9 | <b>1.9</b> | <b>2.0</b> | <b>1.8</b> | <b>1.7</b> | <b>1.7</b> | <b>1.5</b> | <b>1.3</b> |
| 35-49 years                              | 23.9 | <b>2.9</b> | <b>2.9</b> | <b>3.0</b> | <b>2.9</b> | <b>2.8</b> | <b>2.6</b> | <b>2.2</b> |
| 50-64 years                              | 28.8 | <b>3.2</b> | <b>3.1</b> | <b>3.2</b> | <b>3.1</b> | <b>3.2</b> | <b>3.0</b> | <b>2.4</b> |
| 65-79 years                              | 21.9 | <b>4.4</b> | <b>4.4</b> | <b>4.6</b> | <b>4.5</b> | <b>4.5</b> | <b>4.2</b> | <b>3.6</b> |
| 80+ years                                | 6.5  | <b>6.5</b> | <b>6.5</b> | <b>7.0</b> | <b>7.4</b> | <b>7.6</b> | <b>7.3</b> | <b>6.2</b> |
| <b>Aboriginal/Torres Strait Islander</b> |      |            |            |            |            |            |            |            |
| No                                       | 77.9 | <b>3.6</b> | <b>3.6</b> | <b>3.8</b> | <b>3.8</b> | <b>3.8</b> | <b>3.5</b> | <b>3.0</b> |
| Yes                                      | 1.9  | <b>6.5</b> | <b>6.0</b> | <b>6.5</b> | <b>7.3</b> | <b>7.0</b> | <b>6.5</b> | <b>5.3</b> |
| Not recorded                             | 20.2 | <b>3.0</b> | <b>3.1</b> | <b>3.1</b> | <b>3.0</b> | <b>3.3</b> | <b>3.3</b> | <b>2.7</b> |
| <b>IRSAD Quintile</b>                    |      |            |            |            |            |            |            |            |
| Very high                                | 23.9 | <b>2.8</b> | <b>2.8</b> | <b>2.9</b> | <b>2.8</b> | <b>3.0</b> | <b>2.8</b> | <b>2.5</b> |
| High                                     | 16.9 | <b>3.3</b> | <b>3.4</b> | <b>3.8</b> | <b>3.7</b> | <b>3.6</b> | <b>3.4</b> | <b>2.7</b> |
| Middle                                   | 23.0 | <b>3.8</b> | <b>3.6</b> | <b>3.8</b> | <b>4.0</b> | <b>3.8</b> | <b>3.8</b> | <b>3.0</b> |
| Low                                      | 17.3 | <b>3.7</b> | <b>3.7</b> | <b>4.0</b> | <b>3.8</b> | <b>4.2</b> | <b>3.7</b> | <b>3.2</b> |
| Very Low                                 | 18.7 | <b>4.1</b> | <b>4.4</b> | <b>4.3</b> | <b>4.3</b> | <b>4.4</b> | <b>3.9</b> | <b>3.4</b> |

<sup>a</sup> At least three consultations in any two consecutive years from 2012 to 2018. Numbers (n) represent the number of regular patients with a musculoskeletal condition in that year, excluding those who were already on opioids (i.e. patients “at risk”)

<sup>b</sup> Values in parenthesis represent the 95% confidence intervals of the incidence

<sup>c</sup> Logistic regression models with all practice characteristics mutually adjusted. Values in ‘bold’ represent those associations with a p-value <0.01

<sup>d</sup> Values represent the sample distribution according to these characteristics

<sup>e</sup> Logistic regression models with all patient characteristics mutually adjusted + adjustment for practice characteristics. Values in ‘bold’ represent those associations with a p-value <0.01

MSK: Musculoskeletal condition; IRSAD: Index of Relative Socioeconomic Advantage and Disadvantage.



**Table 2. Average time on long-term opioid prescription for the management of musculoskeletal conditions among incident cases according to practice and patient's characteristics. regular patients<sup>a</sup> aged 18+ years. Australia, 2012-2018.**

|                                              | Time on long-term opioids among incident cases (days) |            |            |            |            |            |           |
|----------------------------------------------|-------------------------------------------------------|------------|------------|------------|------------|------------|-----------|
|                                              | 2012                                                  | 2013       | 2014       | 2015       | 2016       | 2017       | 2018      |
| <b>Incident cases</b>                        | 5,621                                                 | 6,647      | 7,944      | 8,652      | 9,572      | 9,958      | 5,672     |
|                                              | 287                                                   | 301        | 295        | 288        | 294        | 229        | 140       |
| <b>Median duration (95%CI)<sup>b</sup></b>   | (266;308)                                             | (281;321)  | (279;311)  | (272;304)  | (281;307)  | (221;237)  | (135;145) |
| <b>Practice characteristics<sup>c</sup></b>  |                                                       |            |            |            |            |            |           |
| <b>State</b>                                 |                                                       |            |            |            |            |            |           |
| NSW                                          | 266                                                   | <b>299</b> | 308        | 273        | <b>292</b> | <b>210</b> | 134       |
| VIC                                          | 283                                                   | <b>309</b> | 312        | 313        | <b>268</b> | <b>230</b> | 141       |
| QLD                                          | 342                                                   | <b>243</b> | 264        | 278        | <b>297</b> | <b>244</b> | 146       |
| WA                                           | 294                                                   | <b>288</b> | 281        | 333        | <b>336</b> | <b>246</b> | 141       |
| TAS                                          | 339                                                   | <b>367</b> | 205        | 367        | <b>292</b> | <b>241</b> | 138       |
| SA                                           | 269                                                   | <b>393</b> | 255        | 292        | <b>402</b> | <b>214</b> | 154       |
| ACT                                          | 327                                                   | <b>299</b> | 431        | 338        | <b>321</b> | <b>267</b> | 186       |
| NT                                           | 249                                                   | <b>683</b> | 261        | 206        | <b>237</b> | <b>116</b> | 108       |
| <b>Rurality</b>                              |                                                       |            |            |            |            |            |           |
| Major cities                                 | 301                                                   | 327        | 288        | 309        | 290        | 221        | 137       |
| Inner regional                               | 309                                                   | 313        | 319        | 290        | 316        | 234        | 142       |
| Outer regional/Remote                        | 242                                                   | 243        | 310        | 309        | 284        | 240        | 148       |
| <b>IRSAD Quintile</b>                        |                                                       |            |            |            |            |            |           |
| Very high                                    | <b>203</b>                                            | <b>214</b> | <b>244</b> | <b>203</b> | <b>247</b> | <b>186</b> | 128       |
| High                                         | <b>231</b>                                            | <b>300</b> | <b>285</b> | <b>299</b> | <b>263</b> | <b>221</b> | 143       |
| Middle                                       | <b>263</b>                                            | <b>319</b> | <b>290</b> | <b>302</b> | <b>320</b> | <b>222</b> | 142       |
| Low                                          | <b>393</b>                                            | <b>341</b> | <b>361</b> | <b>341</b> | <b>293</b> | <b>259</b> | 145       |
| Very Low                                     | <b>349</b>                                            | <b>346</b> | <b>322</b> | <b>355</b> | <b>333</b> | <b>251</b> | 141       |
| <b>Patient's characteristics<sup>d</sup></b> |                                                       |            |            |            |            |            |           |
| <b>Gender</b>                                |                                                       |            |            |            |            |            |           |
| Male                                         | <b>278</b>                                            | <b>272</b> | <b>272</b> | <b>259</b> | <b>271</b> | <b>211</b> | 137       |
| Female                                       | <b>311</b>                                            | <b>349</b> | <b>329</b> | <b>336</b> | <b>323</b> | <b>238</b> | 143       |

| <b>Age</b>                               |     |            |     |     |            |            |     |
|------------------------------------------|-----|------------|-----|-----|------------|------------|-----|
| 18-34 years                              | 230 | <b>361</b> | 276 | 363 | <b>247</b> | <b>233</b> | 147 |
| 35-49 years                              | 335 | <b>361</b> | 345 | 327 | <b>350</b> | <b>257</b> | 154 |
| 50-64 years                              | 299 | <b>337</b> | 320 | 293 | <b>306</b> | <b>221</b> | 142 |
| 65-79 years                              | 278 | <b>257</b> | 277 | 279 | <b>242</b> | <b>203</b> | 132 |
| 80+ years                                | 336 | <b>371</b> | 326 | 336 | <b>379</b> | <b>249</b> | 143 |
| <b>Aboriginal/Torres Strait Islander</b> |     |            |     |     |            |            |     |
| No                                       | 302 | 319        | 308 | 303 | 303        | 224        | 139 |
| Yes                                      | 442 | 376        | 415 | 405 | 381        | 274        | 158 |
| Not recorded                             | 245 | 315        | 278 | 296 | 279        | 232        | 146 |
| <b>IRSAD Quintile</b>                    |     |            |     |     |            |            |     |
| Very high                                | 238 | 287        | 236 | 268 | 277        | 230        | 127 |
| High                                     | 249 | 315        | 258 | 296 | 292        | 218        | 140 |
| Middle                                   | 278 | 315        | 306 | 297 | 319        | 233        | 139 |
| Low                                      | 358 | 333        | 360 | 323 | 303        | 216        | 134 |
| Very Low                                 | 343 | 337        | 343 | 330 | 308        | 232        | 159 |

<sup>a</sup> At least three consultations in any two consecutive years from 2012 to 2018.

<sup>b</sup> Values in parenthesis represent the 95% confidence intervals of the median time on opioids. The corresponding interquartile values are 2012=91-1177; 2013=98-1214; 2014=98-1145; 2015=94-989; 2016=97-759; 2017=91-474; 2018=78-255.

<sup>c</sup> Quantile regression models with all practice characteristics mutually adjusted. Values in 'bold' represent those associations with a p-value <0.01

<sup>d</sup> Quantile regression models with all patient characteristics mutually adjusted + adjustment for practice characteristics. Values in 'bold' represent those associations with a p-value <0.01

MSK: Musculoskeletal condition; IRSAD: Index of Relative Socioeconomic Advantage and Disadvantage.

1  
2  
3  
4  
5 **Figure 1. Algorithm of data extraction from MedicineInsight database for the diagnosis**  
6 **of MSK and opioid prescriptions. Period 2012-2018**  
7  
8

9  
10 **Figure 2. Frequency of long-term opioid prescription for the management of**  
11 **musculoskeletal conditions. regular patients<sup>a</sup> aged 18+ years. Australia, 2012-2018.**  
12 Number in parenthesis (n) represent the total number of regular patients with a musculoskeletal  
13 condition in that year from a total of 811,174 regular patients investigated over the whole  
14 period.  
15  
16  
17  
18  
19  
20  
21  
22  
23  
24  
25  
26  
27  
28  
29  
30  
31  
32  
33  
34  
35  
36  
37  
38  
39  
40  
41  
42  
43  
44  
45  
46  
47  
48  
49  
50  
51  
52  
53  
54  
55  
56  
57  
58  
59  
60

For peer review only

1  
2  
3  
4  
5  
6  
7  
8  
9  
10  
11  
12  
13  
14  
15  
16  
17  
18  
19  
20  
21  
22  
23  
24  
25  
26  
27  
28  
29  
30  
31  
32  
33  
34  
35  
36  
37  
38  
39  
40  
41  
42  
43  
44  
45  
46  
47  
48  
49  
50  
51  
52  
53  
54  
55  
56  
57  
58  
59  
60

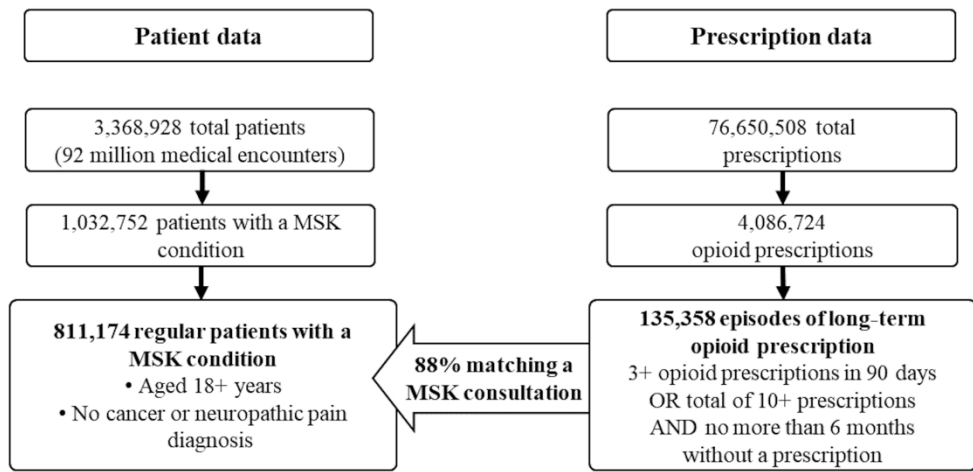

Figure 1. Algorithm of data extraction from MedicineInsight database for the diagnosis of MSK and opioid prescriptions. Period 2012-2018

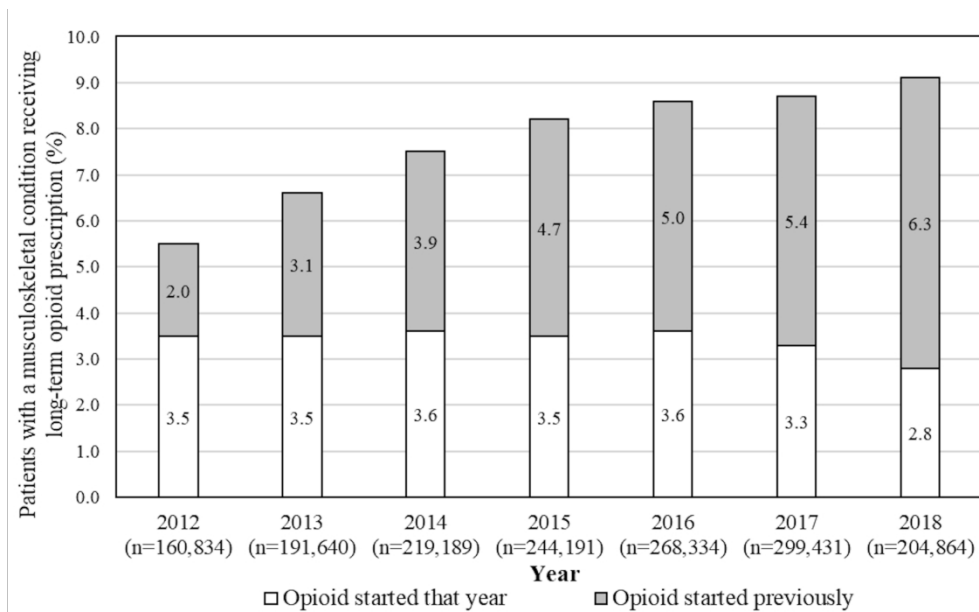

Figure 2. Frequency of long-term opioid prescription for the management of musculoskeletal conditions. regular patients aged 18+ years. Australia, 2012-2018. Number in parenthesis (n) represent the total number of regular patients with a musculoskeletal condition in that year from a total of 811,174 regular patients investigated over the whole period.

STROBE Statement—Checklist of items that should be included in reports of *cohort studies*

|                              | Item No | Recommendation                                                                                                                                                                                                                                                                                                         | Page No                                                  |
|------------------------------|---------|------------------------------------------------------------------------------------------------------------------------------------------------------------------------------------------------------------------------------------------------------------------------------------------------------------------------|----------------------------------------------------------|
| <b>Title and abstract</b>    | 1       | (a) Indicate the study's design with a commonly used term in the title or the abstract<br>(b) Provide in the abstract an informative and balanced summary of what was done and what was found                                                                                                                          | 1,2<br>2                                                 |
| <b>Introduction</b>          |         |                                                                                                                                                                                                                                                                                                                        |                                                          |
| Background/rationale         | 2       | Explain the scientific background and rationale for the investigation being reported                                                                                                                                                                                                                                   | 4                                                        |
| Objectives                   | 3       | State specific objectives, including any prespecified hypotheses                                                                                                                                                                                                                                                       | 5                                                        |
| <b>Methods</b>               |         |                                                                                                                                                                                                                                                                                                                        |                                                          |
| Study design                 | 4       | Present key elements of study design early in the paper                                                                                                                                                                                                                                                                | 5                                                        |
| Setting                      | 5       | Describe the setting, locations, and relevant dates, including periods of recruitment, exposure, follow-up, and data collection                                                                                                                                                                                        | 5-6                                                      |
| Participants                 | 6       | (a) Give the eligibility criteria, and the sources and methods of selection of participants. Describe methods of follow-up<br>(b) For matched studies, give matching criteria and number of exposed and unexposed                                                                                                      | 6                                                        |
| Variables                    | 7       | Clearly define all outcomes, exposures, predictors, potential confounders, and effect modifiers. Give diagnostic criteria, if applicable                                                                                                                                                                               | 6-7                                                      |
| Data sources/<br>measurement | 8*      | For each variable of interest, give sources of data and details of methods of assessment (measurement). Describe comparability of assessment methods if there is more than one group                                                                                                                                   | 6-7                                                      |
| Bias                         | 9       | Describe any efforts to address potential sources of bias                                                                                                                                                                                                                                                              | 6-8                                                      |
| Study size                   | 10      | Explain how the study size was arrived at                                                                                                                                                                                                                                                                              | 6                                                        |
| Quantitative variables       | 11      | Explain how quantitative variables were handled in the analyses. If applicable, describe which groupings were chosen and why                                                                                                                                                                                           | 7-8                                                      |
| Statistical methods          | 12      | (a) Describe all statistical methods, including those used to control for confounding<br>(b) Describe any methods used to examine subgroups and interactions<br>(c) Explain how missing data were addressed<br>(d) If applicable, explain how loss to follow-up was addressed<br>(e) Describe any sensitivity analyses | 8<br>-<br>6-7<br>-<br>-                                  |
| <b>Results</b>               |         |                                                                                                                                                                                                                                                                                                                        |                                                          |
| Participants                 | 13*     | (a) Report numbers of individuals at each stage of study—eg numbers potentially eligible, examined for eligibility, confirmed eligible, included in the study, completing follow-up, and analysed<br>(b) Give reasons for non-participation at each stage<br>(c) Consider use of a flow diagram                        | 6,9,<br>Tables<br>1,2<br>-<br>Fig. 1                     |
| Descriptive data             | 14*     | (a) Give characteristics of study participants (eg demographic, clinical, social) and information on exposures and potential confounders<br>(b) Indicate number of participants with missing data for each variable of interest<br>(c) Summarise follow-up time (eg, average and total amount)                         | 9,<br>Table<br>1<br>9,<br>Table<br>1<br>9,<br>Table<br>1 |

|   |              |     |                                                                |                                    |
|---|--------------|-----|----------------------------------------------------------------|------------------------------------|
| 1 | Outcome data | 15* | Report numbers of outcome events or summary measures over time | 9, 10,<br>Fig. 2,<br>Tables<br>1,2 |
|---|--------------|-----|----------------------------------------------------------------|------------------------------------|

2  
3  
4  
5  
6  
7  
8  
9  
10  
11  
12  
13  
14  
15  
16  
17  
18  
19  
20  
21  
22  
23  
24  
25  
26  
27  
28  
29  
30  
31  
32  
33  
34  
35  
36  
37  
38  
39  
40  
41  
42  
43  
44  
45  
46  
47  
48  
49  
50  
51  
52  
53  
54  
55  
56  
57  
58  
59  
60

For peer review only

|                                                 |                          |    |                                                                                                                                                                                                                                                                                                                                                                                                                       |                                                                  |
|-------------------------------------------------|--------------------------|----|-----------------------------------------------------------------------------------------------------------------------------------------------------------------------------------------------------------------------------------------------------------------------------------------------------------------------------------------------------------------------------------------------------------------------|------------------------------------------------------------------|
| 1<br>2<br>3<br>4<br>5<br>6<br>7<br>8<br>9<br>10 | Main results             | 16 | (a) Give unadjusted estimates and, if applicable, confounder-adjusted estimates and their precision (eg, 95% confidence interval). Make clear which confounders were adjusted for and why they were included<br><br>(b) Report category boundaries when continuous variables were categorized<br><br>(c) If relevant, consider translating estimates of relative risk into absolute risk for a meaningful time period | 9-10, tables 1,2<br><br>9-10, tables 1,2<br><br>9-10, tables 1,2 |
| 11<br>12<br>13                                  | Other analyses           | 17 | Report other analyses done—eg analyses of subgroups and interactions, and sensitivity analyses                                                                                                                                                                                                                                                                                                                        | -                                                                |
| 14                                              | <b>Discussion</b>        |    |                                                                                                                                                                                                                                                                                                                                                                                                                       |                                                                  |
| 15                                              | Key results              | 18 | Summarise key results with reference to study objectives                                                                                                                                                                                                                                                                                                                                                              | 10                                                               |
| 16<br>17<br>18                                  | Limitations              | 19 | Discuss limitations of the study, taking into account sources of potential bias or imprecision. Discuss both direction and magnitude of any potential bias                                                                                                                                                                                                                                                            | 12                                                               |
| 19<br>20                                        | Interpretation           | 20 | Give a cautious overall interpretation of results considering objectives, limitations, multiplicity of analyses, results from similar studies, and other relevant evidence                                                                                                                                                                                                                                            | 11-12                                                            |
| 21<br>22                                        | Generalisability         | 21 | Discuss the generalisability (external validity) of the study results                                                                                                                                                                                                                                                                                                                                                 | 11-12                                                            |
| 23                                              | <b>Other information</b> |    |                                                                                                                                                                                                                                                                                                                                                                                                                       |                                                                  |
| 24<br>25<br>26<br>27                            | Funding                  | 22 | Give the source of funding and the role of the funders for the present study and, if applicable, for the original study on which the present article is based                                                                                                                                                                                                                                                         | 13                                                               |

\*Give information separately for exposed and unexposed groups.

**Note:** An Explanation and Elaboration article discusses each checklist item and gives methodological background and published examples of transparent reporting. The STROBE checklist is best used in conjunction with this article (freely available on the Web sites of PLoS Medicine at <http://www.plosmedicine.org/>, Annals of Internal Medicine at <http://www.annals.org/>, and Epidemiology at <http://www.epidem.com/>). Information on the STROBE Initiative is available at <http://www.strobe-statement.org>.



# BMJ Open

## Trends in long-term opioid prescriptions for musculoskeletal conditions in Australian general practice: a national longitudinal study using MedicineInsight, 2012-2018

|                                 |                                                                                                                                                                                                                                                                                                                                                                                                                                                                                       |
|---------------------------------|---------------------------------------------------------------------------------------------------------------------------------------------------------------------------------------------------------------------------------------------------------------------------------------------------------------------------------------------------------------------------------------------------------------------------------------------------------------------------------------|
| Journal:                        | <i>BMJ Open</i>                                                                                                                                                                                                                                                                                                                                                                                                                                                                       |
| Manuscript ID                   | bmjopen-2020-045418.R1                                                                                                                                                                                                                                                                                                                                                                                                                                                                |
| Article Type:                   | Original research                                                                                                                                                                                                                                                                                                                                                                                                                                                                     |
| Date Submitted by the Author:   | 01-Feb-2021                                                                                                                                                                                                                                                                                                                                                                                                                                                                           |
| Complete List of Authors:       | Black-Tiong, Sean; The University of Adelaide Faculty of Health and Medical Sciences, Discipline of General Practice, Adelaide Medical School<br>Gonzalez-Chica, David; The University of Adelaide Faculty of Health and Medical Sciences, Discipline of General Practice, Adelaide Medical School;<br>The University of Adelaide, Adelaide Rural Clinical School<br>Stocks, Nigel; The University of Adelaide Faculty of Health and Medical Sciences, Discipline of General Practice |
| <b>Primary Subject Heading</b>: | Epidemiology                                                                                                                                                                                                                                                                                                                                                                                                                                                                          |
| Secondary Subject Heading:      | Pharmacology and therapeutics, Epidemiology, General practice / Family practice, Medical management, Public health                                                                                                                                                                                                                                                                                                                                                                    |
| Keywords:                       | Musculoskeletal disorders < ORTHOPAEDIC & TRAUMA SURGERY, PAIN MANAGEMENT, EPIDEMIOLOGY, Back pain < ORTHOPAEDIC & TRAUMA SURGERY, PRIMARY CARE, PUBLIC HEALTH                                                                                                                                                                                                                                                                                                                        |
|                                 |                                                                                                                                                                                                                                                                                                                                                                                                                                                                                       |

SCHOLARONE™  
Manuscripts

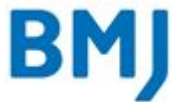

I, the Submitting Author has the right to grant and does grant on behalf of all authors of the Work (as defined in the below author licence), an exclusive licence and/or a non-exclusive licence for contributions from authors who are: i) UK Crown employees; ii) where BMJ has agreed a CC-BY licence shall apply, and/or iii) in accordance with the terms applicable for US Federal Government officers or employees acting as part of their official duties; on a worldwide, perpetual, irrevocable, royalty-free basis to BMJ Publishing Group Ltd ("BMJ") its licensees and where the relevant Journal is co-owned by BMJ to the co-owners of the Journal, to publish the Work in this journal and any other BMJ products and to exploit all rights, as set out in our [licence](#).

The Submitting Author accepts and understands that any supply made under these terms is made by BMJ to the Submitting Author unless you are acting as an employee on behalf of your employer or a postgraduate student of an affiliated institution which is paying any applicable article publishing charge ("APC") for Open Access articles. Where the Submitting Author wishes to make the Work available on an Open Access basis (and intends to pay the relevant APC), the terms of reuse of such Open Access shall be governed by a Creative Commons licence – details of these licences and which [Creative Commons](#) licence will apply to this Work are set out in our licence referred to above.

Other than as permitted in any relevant BMJ Author's Self Archiving Policies, I confirm this Work has not been accepted for publication elsewhere, is not being considered for publication elsewhere and does not duplicate material already published. I confirm all authors consent to publication of this Work and authorise the granting of this licence.

1  
2  
3  
4 **1 Trends in long-term opioid prescriptions for musculoskeletal conditions in Australian**  
5 **2 general practice: a national longitudinal study using MedicineInsight, 2012-2018**

6  
7  
8  
9 3 Short Title: Trends in long-term opioid prescribing in Australia

10  
11 4  
12  
13 5  
14  
15 6 Sean Black-Tiong<sup>1</sup>

16  
17 7 [sean.black-tiong@adelaide.edu.au](mailto:sean.black-tiong@adelaide.edu.au)

18  
19 8 David Alejandro Gonzalez-Chica<sup>1,2</sup>

20  
21 9 [david.gonzalez@adelaide.edu.au](mailto:david.gonzalez@adelaide.edu.au)

22  
23 10 Nigel Stocks<sup>1</sup>

24  
25 11 [nigel.stocks@adelaide.edu.au](mailto:nigel.stocks@adelaide.edu.au)

26  
27 12  
28  
29 13 <sup>1</sup> Discipline of General Practice, Adelaide Medical School, The University of Adelaide,  
30 14 Adelaide, SA, Australia

31  
32 15 <sup>2</sup> Adelaide Rural Clinical School, The University of Adelaide, Adelaide, SA, Australia

33  
34 16  
35  
36 17 Corresponding author:

37  
38 18 David Alejandro Gonzalez-Chica

39  
40 19 Discipline of General Practice, The University of Adelaide, Helen Mayo North building, 109  
41 20 Frome Road, Level 1, Room 113. Adelaide, 5005, South Australia, Australia.

42  
43 21 E-mail: [david.gonzalez@adelaide.edu.au](mailto:david.gonzalez@adelaide.edu.au)

44  
45 22 Phone: +61 8 8313 1631

46  
47 23  
48  
49 24  
50  
51 25  
52  
53 26  
54  
55 27 Word count: 3,958

## 1 ABSTRACT

2 **Objective:** Describe trends and patterns in long-term opioid prescriptions among adults with  
3 musculoskeletal conditions (MSK).

4 **Design:** Interrupted time-series analysis based on an open cohort study

5 **Setting:** A representative sample of 402 Australian general practices contributing data to the  
6 MedicineInsight database.

7 **Participants:** 811,174 patients aged 18+ years with a MSK diagnosis and three or more  
8 consultations in any two consecutive years between 2012 and 2018. Males represented 44.5%  
9 of the sample, 28.4% had 65+ years, and 1.9% were Aboriginal or Torres Strait Islanders.

10 **Primary and secondary outcome measures:** Annual prevalence and cumulative incidence  
11 (%) of long-term opioid prescribing (3+ prescriptions in 90 days) among patients with a MSK.  
12 Average duration of these episodes in each year between 2012 and 2018.

13 **Results:** The prevalence of long-term opioid prescribing increased from 5.5% (95%CI 5.2-5.8)  
14 in 2012 to 9.1% (95%CI 8.8-9.7) in 2018 [annual change OR=1.09 IC95% 1.08-1.09], but a  
15 slightly lower incidence was observed in 2018 [3.0% vs 3.6-3.8% in other years; annual change  
16 OR=0.99 IC95% 0.98-0.99]. The incidence was between 37%-52% higher among practices  
17 located in rural Australia or lower socioeconomic areas. Individual risk factors included  
18 increasing age (3.4 times higher among those aged 80+ years than the 18-34-year group in  
19 2012, increasing to 4.8% in 2018), identifying as Aboriginal or Torres Strait Islander (1.7-1.9  
20 higher incidence than their peers), or living in disadvantaged areas (36%-57% more likely than  
21 among those living in wealthiest areas). Long-term opioid prescriptions lasted in average 287-  
22 301 days between 2012-2016, reducing to 229 days in 2017 and 140 days in 2018. A longer  
23 duration was observed in practices from more disadvantaged areas and females in all years,  
24 except in 2018.

25 **Conclusions:** The continued rise in the prevalence of long-term opioid prescribing is of  
26 concern, despite a recent reduction in the incidence and duration of opioid management.

27 **Keywords:** Narcotic Analgesics, Electronic Health Records, Musculoskeletal Diseases,  
28 Chronic Pain, Incidence

## 1 ARTICLE SUMMARY

### 2 Strengths and limitations of this study

- 3 • A national sample including 135,358 instances of long-term opioid prescriptions (3+ opioid  
4 prescriptions in 90 days) and 811,174 adult patients with musculoskeletal conditions from  
5 Australian general practice over seven years.
- 6 • Patients and practices from all Australian states, with different socioeconomic and  
7 demographic profiles, and from urban and rural regions are included in the study.
- 8 • The study explores the incidence and duration of long-term opioid prescriptions over time  
9 and their association with sociodemographic characteristics.
- 10 • Individuals attending multiple clinics for prescriptions are not tracked by MedicineInsight,  
11 which may underestimate the real frequency. Moreover, the findings reflect prescribing  
12 patterns rather than medication use, and the available data does not allow the investigation  
13 of the place/professional that initiated these prescriptions.

## 1 INTRODUCTION

2 Musculoskeletal conditions (MSK) represent a public health problem worldwide due to their  
3 substantial impact on the quality of life, increasing prevalence, and contribution to the global  
4 burden of disability.<sup>1 2</sup> In Australia, MSK affect approximately 30% of adults (6.1 million  
5 individuals), but its prevalence is even higher in lower socioeconomic groups and the elderly.<sup>3-5</sup>  
6 In terms of health costs, MSK accounted for \$5,690 million in 2008-09, representing 9% of the  
7 total Australian health-care expenditure in that year and the fourth most expensive group of  
8 diseases in the country.<sup>6</sup> MSK are among the ten most frequent problems managed by general  
9 practitioners (GPs).<sup>4</sup> The principal symptom associated with these visits is chronic pain.<sup>1 3 5-7</sup>

10 Countries such as Australia, the United States, Canada, Belgium and the United Kingdom  
11 recognise MSK and chronic pain management as a public health priority and have developed  
12 national policies aiming to improve prevention and management.<sup>1 8</sup> The strategies and actions  
13 include models of care orientated toward high-value care options for MSK pain management,  
14 as well as regular monitoring of their prevalence, patterns of medication use/prescription, and  
15 side effects related to the use of these medications.<sup>1 2 8</sup> Current guidelines recommend non-  
16 pharmacological interventions as the primary initial approach for managing MSK pain.  
17 Simultaneously, non-steroidal anti-inflammatory drugs (NSAIDs) represent the first-line  
18 pharmacological therapy.<sup>8-10</sup> The use of opioids for pain management is discouraged due to the  
19 increased risk of severe side effects, especially in elderly patients or among long-term users.  
20 <sup>8-15</sup> Harmful effects associated with opioid use include sedation, falls, respiratory depression,  
21 and death, as well as an increased risk of dependence and diversion. Moreover, long-term use  
22 of opioids can potentiate chronic pain mechanisms, reducing the effect of these drugs at  
23 standard doses.<sup>8 9 14</sup>

24 Despite their recognised harmful effects, opioid use has increased in the last decades, especially  
25 among high-income countries such as the United States, Canada, the United Kingdom,  
26 Germany, Norway, Australia and New Zealand.<sup>16-20</sup> In the United States, for example, the use  
27 of opioids (licit and illicit) escalated 10-14 times in the last two decades, while in Australia  
28 there was a 238% increase in the number of people receiving potent opioids between 2006 and  
29 2015.<sup>19 20</sup> However, some countries have reported an apparent plateau of opioid use among  
30 patients with MSK in recent years.<sup>15 21-26</sup> In Australia, a systematic review showed a significant  
31 rise in opioid use up to 2017, mainly driven by oxycodone.<sup>27</sup> Nonetheless, most data regarding  
32 opioid use in Australia analysed data from the Pharmaceutical Benefits Scheme (PBS)

1  
2  
3  
4  
5 1 database.<sup>27</sup> PBS data represent an efficient and cost-effective way to monitor dispensed  
6  
7 2 medicines and trends over time<sup>28</sup>. However, studies based on dispensed medications tend to  
8  
9 3 underestimate opioid use<sup>29</sup>, the investigation of patterns is usually restricted to age and sex  
10  
11 4 distribution, and the use of aggregated data cannot distinguish between incident users,  
12  
13 5 prevalent users or long-term users.<sup>27</sup> Understanding the determinants and patterns of long-term  
14  
15 6 opioid prescription/use is fundamental to inform stakeholders and propose targeted  
16  
17 7 interventions aiming to reduce their use for MSK management.<sup>11-13 18 27</sup> In Australia, only a  
18  
19 8 few studies have examined opioid prescribing and its association with sociodemographic  
20  
21 9 characteristics at the local level but not across states or including urban and rural areas.<sup>30 31</sup>

22  
23 10 In this sense, MedicineInsight is a national longitudinal database established in 2011 by NPS  
24  
25 11 MedicineWise to collect comprehensive, de-identified patient data from GP electronic medical  
26  
27 12 records (EMR) across Australia.<sup>32</sup> Data from MedicineInsight has been previously used to  
28  
29 13 assess trends and patterns of preventive activities, medication prescriptions and laboratory  
30  
31 14 requests for acute and chronic conditions managed in Australian general practice.<sup>5 32-37</sup> This  
32  
33 15 study aims to utilise MedicineInsight data to estimate the prevalence and cumulative incidence  
34  
35 16 of long-term opioid prescriptions among adult patients with MSK. Furthermore, it describes  
36  
37 17 trends in opioid prescriptions between 2012-2018 and investigates associations with patient  
38  
39 18 and practice characteristics.

## 40 **METHODS**

### 41 *Study design*

42  
43  
44 22 This is an interrupted time-series study analysing data from MedicineInsight, a large general  
45  
46 23 practice database including patients from 662 general practices (8.2% of all general practices  
47  
48 24 in Australia) and over 2,700 GPs across Australia.<sup>32</sup> Although practices participating in  
49  
50 25 MedicineInsight were recruited using a non-random process, all Australian states and regions  
51  
52 26 are represented, and the database includes practices vary in size and type of services offered.  
53  
54 27 Patients in the database have been found to be comparable with the general population as  
55  
56 28 measured by sociodemographic variables and clinical conditions.<sup>5 32</sup> The information extracted  
57  
58 29 from MedicineInsight for the present study include EMR dating between 1 January 2011 and  
59  
60 30 31 December 2018.

1  
2  
3  
4  
5 1 Patients within a practice have a unique identifying number which allows all the EMR held in  
6  
7 2 the database for an individual to be linked and tracked over time. Patients' EMR are collected  
8  
9 3 monthly, de-identified and securely transferred to NPS MedicineWise's data warehouse.  
10  
11 4 Routinely collected information includes: demographics (gender, aboriginality, year of birth,  
12  
13 5 patient postcode and area of residence), clinical information (diagnoses, reasons for  
14  
15 6 consultation, immunisations), prescribed medications (generic and brand names, doses, active  
16  
17 7 ingredient and number of repeats reasons for prescription, known allergies, drug reactions),  
18  
19 8 pathology test results, clinical measurements (temperature, blood pressure, weight, height,  
20  
21 9 waist circumference), and smoking status.<sup>32</sup>

### 22 *Participants*

23  
24 11 To improve data quality, only practices established for at least two years before the end of the  
25  
26 12 analysis period, with recorded data (i.e., diagnosis, reason for encounter, or reason for  
27  
28 13 prescription) in at least 10% of clinical encounters, an average of 30 or more prescriptions per  
29  
30 14 week and a consistent number of consultations over time (i.e. ratio between the highest and  
31  
32 15 lowest number of annual total consultations lower than five, no gaps of more than six weeks in  
33  
34 16 the previous two years in practice data) were included.

35  
36 17 The sample included all regular patients (i.e. individuals with three or more consultations in  
37  
38 18 any two consecutive years) aged 18 years or older (Figure 1). The sample was further restricted  
39  
40 19 to patients with at least one recorded visit in the 12 months preceding the initial opioid  
41  
42 20 prescription and follow-up time ended six months after the last medical encounter, in order to  
43  
44 21 differentiate between past and current patients on opioids.<sup>21</sup> Therefore, despite data in  
45  
46 22 MedicineInsight was available since 2011, the analyses were restricted to the period 2012-  
47  
48 23 2018. Patients were also excluded if they had a record of cancer or neuropathic pain up to 12  
49  
50 24 months before or six months after the start date of the initial long-term opioid prescription  
51  
52 25 episode. Therefore, we used data from 811,174 regular adult patients with MSK attending 402  
53  
54 26 general practices across Australia.

55  
56  
57 27 *[FIGURE 1 HERE]*

### 58 *Musculoskeletal conditions*

59  
60 29 Data regarding MSK conditions were extracted from the database using previously published  
30  
31 30 algorithms.<sup>5</sup> The diagnosis, reason for encounter and reason for prescription fields were used



1 to identify patients with a potentially painful MSK condition, as these are typical fields used  
2 by GPs to record morbidity in Australian general practice.<sup>32</sup> Most general practices use coding  
3 systems (i.e. 'Docle', 'Pyefinch' or the International Classification of Primary Care 2), and  
4 these were mapped to the Systematized Nomenclature of Medicine - Clinical Terms  
5 (SNOMED-CT).<sup>5 32 38</sup> The list of MSK conditions included i) osteoarthritis, ii) osteoarthritis,  
6 iii) spondylarthritis, iv) fibromyalgia, v) polymyalgia rheumatica, vi) rheumatoid arthritis, vii)  
7 myofascial pain, viii) chronic fatigue syndrome, ix) gout, x) Paget disease, xi) osteoporosis,  
8 xii) tenosynovitis, xiii) chronic back pain and xiv) other conditions recorded as 'chronic  
9 musculoskeletal pain'. Synonyms and misspellings of these terms were also used, considering  
10 that GPs can also use free-text in the completion of the diagnosis. The data extraction  
11 algorithms used in this study are available from the authors by request.

### 12 *Prescription data*

13 Data regarding opioid prescriptions (i.e. codeine, tramadol, tapentadol, oxycodone, morphine,  
14 fentanyl, buprenorphine, hydromorphone) were extracted from the prescription dataset using  
15 generic and brand names.<sup>39</sup> Using recommendations from the literature,<sup>21 40</sup> a new 'episode of  
16 opioid prescription' was defined as a prescription provided to the patient where no opioid was  
17 prescribed within six months from the 'end of the last episode'. The 'end date' of an 'episode  
18 of opioid prescription' was considered as being 28 days after the last prescription was provided  
19 (i.e. in Australia, opioids can be prescribed for up to 28 days without repeats).<sup>8 39</sup> An episode  
20 of 'long-term opioid prescription' was defined as patients receiving i) three or more scripts  
21 (including the initiating script) within 90 days of the initial script or ii) a total of 10 or more  
22 consecutive scripts with an interval lower than 180 between 'episodes of opioid prescription',  
23 even though the first three were not provided within 90 days. An episode of 'long-term opioid  
24 prescription' ended when the patient had not received a prescription for opioids for six or more  
25 months.<sup>8 39</sup> A total of 135,358 instances of long-term opioid prescriptions were identified over  
26 the period (Figure 1), with 88% of them matching a consultation when the GP recorded a MSK  
27 as the reason for diagnosis, reason for encounter and/or reason for prescription (i.e. excluding  
28 cancer or neuropathic pain) within a period lasting from 30 days before the initial opioid  
29 prescription, or up to 120 days after it.<sup>8 39</sup>

### 30 *Data analysis*

1  
2  
3  
4 1 The prevalence of long-term opioid prescriptions was estimated as the percentage of regular  
5 2 patients with MSK attending the practice that year that were on opioids (i.e. long-term opioid  
6 3 prescription), either because these prescriptions started in that year or previous years. The  
7 4 cumulative incidence of long-term opioid prescription was estimated as the percentage of  
8 5 regular patients with MSK in any year between 2012 and 2018 starting opioids that year (i.e.  
9 6 patients “at risk” not on opioids). The average annual change in the prevalence or incidence of  
10 7 long term opioid prescription was investigated using logistic regression, and the results  
11 8 expressed as odds ratios (OR) with their respective 95% confidence intervals (95% CI).

12 9 The association between sociodemographic characteristics and the incidence of long-term  
13 10 opioid prescription was also explored using logistic regression, and the variables were included  
14 11 in the models considering two hierarchical levels. The first level included practice  
15 12 characteristics: state, rurality (i.e. major cities, inner regional, or outer regional/remote  
16 13 Australia) and the practice’s Index of Relative Socioeconomic Advantage and Disadvantage  
17 14 [IRSAD, as provided by MedicineInsight (based on the postcode of the practice) and divided  
18 15 in quintiles]. IRSAD is a relative indicator of economic and social advantage/disadvantage of  
19 16 people and households within an area generated by the Australian Bureau of Statistics and  
20 17 based on a range of census variables.<sup>41</sup> Higher IRSAD scores indicate that the practice is  
21 18 located in a more advantaged area. The second level included patient characteristics: gender  
22 19 (males/females), age in groups (18-34, 35-49, 50-64, 65-79, 80+ years), aboriginality  
23 20 (Aboriginal or Torres Strait Islander: No, Yes, not recorded), and the patient’s IRSAD (divided  
24 21 in quintiles).

25 22 Results of the logistic regression models were expressed as marginal predicted probabilities  
26 23 (i.e. adjusted cumulative incidence) instead of odds ratio to facilitate interpretation of the  
27 24 results, as many medical doctors, researchers and health policymakers are not familiar with  
28 25 these measures of association.<sup>42</sup> Wald tests for heterogeneity or trend were used to estimate the  
29 26 p-values due to the use of clustered data (i.e. practice defined as the cluster).

30 27 Quantile regression models were used to investigate the variables associated with the median  
31 28 duration (in days) of the long-term opioid prescription among incident cases, considering the  
32 29 same levels of adjustment as above.

33 30 All analyses were performed using the statistical software STATA 15.0 (StataCorp, Texas,  
34 31 USA) and conditioned to the patient’s probability of being in the sample to minimise selection  
35 32  
36 33  
37 34  
38 35  
39 36  
40 37  
41 38  
42 39  
43 40  
44 41  
45 42  
46 43  
47 44  
48 45  
49 46  
50 47  
51 48  
52 49  
53 50  
54 51  
55 52  
56 53  
57 54  
58 55  
59 56  
60 57

1 bias (i.e. the likelihood of receiving medical treatments or diagnosis increase with the number  
2 of visits to the practice).<sup>43</sup>

### 3 *Ethics approval*

4 The Human Research Ethics Committee of the University of Adelaide exempted this study of  
5 an ethical review as only non-identifiable data was used. Access to the data for this study was  
6 approved by the MedicineInsight Data Governance Committee (project 2016–004 and 2019-  
7 029).

### 8 *Patient and public involvement*

9 Patients or the public were not directly involved in the design, conduct, reporting, or  
10 dissemination plans of our research. However, the provision of information for the study  
11 underwent a formal approval process guided by the MedicineInsight independent external Data  
12 Governance Committee that includes GPs, consumer advocates, privacy experts and  
13 researchers. Moreover, two of the authors are active GPs regularly attending patients affected  
14 by MSK, which also supported the design of the study.

## 15 **RESULTS**

16 MedicineInsight included a total sample of 3,368,928 total patients, with 1,936,573 of them  
17 aged 18 years or older (Figure 1). Most practices were from New South Wales (35.5%) and  
18 Victoria (21.7%) and located in major cities (60.5%), but practices from all regions and with a  
19 different socioeconomic profile were included (Supplementary Table 1). Males represented  
20 42.2% of the adults in the database, while 28.7% were 65 years or older and 2.0% Aboriginals  
21 or Torres Strait islanders. The most common MSK among patients aged 18+ years were chronic  
22 back pain (16.6%), osteoarthritis (13.7%), tenosynovitis (6.7%) osteoporosis (4.2) and gout  
23 (4.0%). The rest of the conditions showed a prevalence lower than 1%.

24 The analysed sample of unique regular adult patients with MSK attending one of the  
25 MedicineInsight practices between 2012 and 2018 consisted of 811,174 individuals. As shown  
26 in Figure 2, the number of these patients per year ranged between 160,834 and 299,431  
27 individuals.

28 The overall ‘prevalence’ of long-term opioid prescribing (i.e. patients with MSK on opioids,  
29 either because they started that year or in previous years) increased from 5.5% (95% CI 5.2-  
30 5.8) in 2012 to 9.1% (95% CI 8.8-9.7) in 2018 [annual change OR=1.09 IC95% 1.08-1.09; p-

1 value for trend <0.001]. Figure 2 shows the increase was related to a higher proportion of  
2 patients starting opioids in previous years, rather than a rise in incident cases (i.e. those who  
3 started opioids in that year).

4 [FIGURE 2 HERE]

5 The MSK with the highest rate of long-term opioid prescribing were spondyloarthritis (13.8%)  
6 and fibromyalgia (13.3%) in 2012, and Paget disease (22.2%) and fibromyalgia (21.4%) in  
7 2018 (Supplementary Figure 1). Patients with fatigue syndrome or gout were less likely to be  
8 on long-term opioids (4.4% and 3.4% in 2012; 8.6% and 6.9% in 2018, respectively).

9 Table 1 shows males represented 44.5% of the sample, 28.4% had 65+ years, and 1.9% were  
10 Aboriginal or Torres Strait Islanders. Individuals from different socioeconomic settings were  
11 all represented in the study, and 40.0% were for regional or remote areas. The cumulative  
12 incidence of long-term opioid prescription (i.e. excluding those who were already on opioids)  
13 among regular patients with a MSK ranged between 3.6% and 3.8% between 2012-2016,  
14 dropping to 3.0% in 2018 [3.0%; annual change OR=0.99 IC95% 0.98-0.99; p-value for trend  
15 0.002].

16 The same table also shows the sociodemographic factors associated with the cumulative  
17 incidence of long-term opioid prescribing. In any investigated year, the cumulative incidence  
18 was 37%-52% higher among individuals attending practices located in rural Australia or areas  
19 with a very low IRSAD, compared to those attending practices located in major cities or areas  
20 with a higher IRSAD. Individual risk factors associated with a higher incidence of long-term  
21 opioid prescribing included increasing age (3.4 times higher among those aged 80+ years than  
22 the 18-34-year group in 2012, increasing to 4.8% in 2018), identifying as an Aboriginal or  
23 Torres Strait Islander (1.7-1.9 higher incidence than their peers), or living in areas with a lower  
24 IRSAD (36%-57% more likely than among those living in wealthiest areas). Neither the state  
25 where the practice was located nor the patient's gender was associated with this outcome.

26 [TABLE 1 HERE]

27 The average duration of the long-term opioid prescriptions among incident cases ranged from  
28 287 to 301 days between 2012-2016, reducing to 229 days in 2017 and 140 days in 2018 (Table  
29 2). The most consistent pattern observed over the investigated years was an increased duration  
30 of prescribing among individuals attending practices located in lower socioeconomic areas (i.e.

1 up to 152 days longer than those attending practices located in the wealthiest areas) or females  
2 (i.e. up to 77 days longer than in males). However, these differences were not evident in 2018.

3 [TABLE 2 HERE]

4 Figure 3 shows that 74.4% (CI 95% 72.9-75.8) of those that started long-term opioid  
5 prescriptions in 2012 were still receiving these prescriptions after one year, while for those  
6 starting opioids in 2017, the proportion was 76.3% (95% CI 75.0-77.6). The proportion of  
7 patients in each cohort still on these prescriptions decreased to 54%-56% in year two and to  
8 48-51% in year three after starting long-term opioid prescriptions, remaining steady at around  
9 48% in subsequent years.

10 [FIGURE 3 HERE]

## 11 DISCUSSION

12 To the best of our knowledge, this is the first Australian study that uses EMR from a national  
13 general practice database to investigate patterns of long-term opioid prescriptions for patients  
14 with MSK.<sup>27</sup> Three main findings can be highlighted from the results. Firstly, the overall  
15 prevalence of long-term opioid prescriptions increased between 2012 and 2018 as a  
16 consequence of the progressive rise of patients starting opioids in previous years rather than  
17 for an upsurge of incident cases. Secondly, factors associated with a higher incidence of long-  
18 term opioid prescription included increasing age, identifying as Aboriginal or Torres Strait  
19 Islander, living in a lower socioeconomic area, or attending practices located in a rural setting  
20 or more disadvantaged areas. Finally, a longer duration of these episodes was observed among  
21 females or patients attending practices in lower socioeconomic areas.

22 The increase in the prevalence of long-term opioid prescriptions is consistent with other  
23 Australian studies using PBS data (9, 22).<sup>11 20 27</sup> The observed increase in opioids prescriptions  
24 represents a substantial ongoing burden for Australia. In 2015-16, the total direct cost related  
25 to opioid use in Australia (i.e. premature mortality, health care, criminal justice) was estimated  
26 in \$15.76 billion, with additional \$26.8 associated the loss of quality of life of users and co-  
27 residents.<sup>44</sup> Some authors suggest the increase in opioid use/prescription is related to the ageing  
28 population with higher rates of MSK, availability of slow-release opioid formulations and  
29 aggressive marketing of opioids by pharmaceutical companies.<sup>1 2 21</sup> Moreover, the observed  
30 increase in Australia is probably related to the prescription of potent opioids. A previous study

1  
2  
3  
4  
5 1 using PBS data found that between 2006-2015 weaker opioid use remained stable or declined,  
6 2 while there was a 238% increase in persons dispensed only strong opioids.<sup>20</sup> Nonetheless, there  
7 3 is evidence that long-term opioid prescription for patients with MSK in the UK and North  
8 4 America reached a plateau around 2009-2011.<sup>21 22 45</sup>

11  
12 5 Previous studies have also reported the incidence of opioid use has either decreased or  
13 6 remained unchanged in recent years, despite a rise in the prevalence.<sup>46-48</sup> In consonance with  
14 7 these studies, we found a steady incidence between 2012-2016, followed by a lower incidence  
15 8 in 2018. Interestingly, the duration of long-term opioid prescription also declined in newly  
16 9 incident cases in 2017 and 2018 compared to the previous five years. Although results for  
17 10 2018 might reflect an insufficient follow-up of incident cases in that year, it would not explain  
18 11 the findings observed in 2017. Recent education strategies among GPs and health policy  
19 12 changes may have helped reduce opioid initiation and duration when prescribing to someone  
20 13 affected by MSK.<sup>8 9 14 39</sup> However, the increasing prevalence between 2012-2018 with an  
21 14 upsurging number of patients starting opioids in previous years (i.e. 'prevalent' cases) may  
22 15 suggest insufficient pro-active opioid de-prescribing is being undertaken. This conclusion is  
23 16 reinforced by the findings that four years or after starting long-term opioid prescriptions, half  
24 17 the patients continued to receive these prescriptions. Therefore, after all that time receiving  
25 18 opioids, it is likely that a considerable number of these patients became either dependent or  
26 19 possibly addicted to opioids.<sup>8 11 19</sup>

28  
29  
30  
31  
32  
33  
34  
35  
36  
37  
38  
39 20 It is also overwhelming that sedative-hypnotics drugs (i.e. benzodiazepines and Z-drugs) are  
40 21 being concomitantly prescribed with of opioids, increasing the risk of addiction,  
41 22 hospitalisations and deaths.<sup>19 49 50</sup> Preliminary findings using MedicineInsight data show that  
42 23 the proportion of patients with MSK on long-term opioids prescriptions also receiving long-  
43 24 term benzodiazepines/Z-drugs prescriptions increased from 24.4 % (95% CI 23.3-25.5) in 2012  
44 25 to 30.0% (95% CI 29.0-30.9%). In contrast, among patients with MSK not receiving opioids,  
45 26 only 7.1% received long-term benzodiazepines/Z-drugs prescriptions in 2012 or 2018  
46 27 (unpublished results). These findings help explain the substantial increase of opioid-induced  
47 28 deaths in Australia, which raised from 2.67 per 100,00 people in 2001 (514 out of 1,038 total  
48 29 drug-induced deaths) to 4.36 per 100,000 people in 2018 (1,088 out of 1,740 total drug-induced  
49 30 deaths).<sup>44 49</sup>

51  
52  
53  
54  
55  
56  
57  
58 31 Factors such as limited time of clinicians, insufficient training on de-prescribing, restricted  
59 32 access to resources for monitoring patients using opioids are recognised barriers that affect

1 strategies aiming to improve opioid prescription practices in primary care.<sup>1 51</sup> Moreover,  
2 pharmaceutical companies' aggressive marketing strategies also influence opioid prescription  
3 practices. In 2019, the Therapeutic Goods Administration fined Mundipharma \$302,400 for  
4 infringement notices related to misleading, imbalanced and inaccurate claims of promotional  
5 materials directed to Australian health professionals, all of them related to nine opioid  
6 medicines marketed under the name Targin®.<sup>52</sup>

7 Our finding that the elderly, patients living in lower socioeconomic areas, attending practices  
8 located in more disadvantaged settings or from rural and remote Australia have higher rates of  
9 long-term opioid prescription is consistent with British and American studies,<sup>21 22 53</sup> as well as  
10 with results based on PBS data.<sup>11 30 31</sup> These groups are also more likely to be affected by  
11 chronic MSK conditions<sup>5 21</sup>. Perhaps a maldistribution of support services or access to tertiary  
12 based pain clinics could partially explain these differences<sup>51</sup>, but further studies would be  
13 necessary to investigate the underlying causes in the Australian context.

#### 14 **Strengths and limitations**

15 The study has significant strengths: a national sample including adult patients of all age groups,  
16 ethnicity, or sex, and practices from all Australian states, socioeconomic areas, or remoteness.  
17 Despite the novelty in the use of a national general practice database that allows the  
18 identification of patients with MSK and the reason for opioid prescription, differentiates  
19 between incident and prevalent cases, and provides data on different associated factors, some  
20 limitations have to be recognised.

21 First, medicine-use information from MedicineInsight relates to records of GP prescribing, and  
22 not all prescriptions and repeats will be dispensed or taken by the patient. Therefore, results  
23 from this study reflect prescription patterns rather than opioid use.

24 Second, our study did not distinguish between the strength of preparations (i.e. presented as  
25 either morphine equivalent doses or defined daily dose). However, previous studies found that  
26 up to 40% of the dispensed pain medications for non-cancer pain are potent opioids, and their  
27 use has increased over the years.<sup>15 17 20</sup>

28 Third, individuals attending multiple clinics for prescriptions are not tracked by  
29 MedicineInsight, and this may underestimate the real frequency of long-term opioid  
30 prescriptions. However, the observed trends and associations are consistent with the available  
31 literature.<sup>11 20-22 27 45</sup>

1  
2  
3  
4  
5 1 Finally, the place/professional that initiated the prescriptions (e.g. Emergency Department,  
6  
7 2 hospital, private specialist) cannot be investigated. Moreover, MedicineInsight does not  
8  
9 3 provide details on the size and type of practices or characteristics of the doctors prescribing  
10  
11 4 opioids (e.g. junior doctor, specialist, or GPs; years of experience, etc.) Nonetheless, according  
12  
13 5 to PBS data, half of the opioids prescribed in Australia are initiated by general practitioners<sup>17</sup>  
14  
15 6 and most patients with chronic pain requiring long-term opioid prescriptions are managed in  
16  
17 7 primary care settings.<sup>51</sup>

## 17 8 **CONCLUSION**

19  
20 9 The overall prevalence of long-term opioid prescribing for MSK conditions has increased in  
21  
22 10 Australia between 2012 and 2018, despite a lower incidence and duration of these prescriptions  
23  
24 11 in the last couple of years. This trend towards an increase in the prevalence of long-term opioid  
25  
26 12 prescribing is of great concern, as current literature reports an overall escalation in the rates of  
27  
28 13 opioid harms and deaths.<sup>8 9 11 14</sup> Our study highlights the need for ongoing efforts to reduce the  
29  
30 14 opioid burden, especially among those living and attending practices in more disadvantaged  
31  
32 15 areas and considering the higher risk of adverse effect in elderly patients. This should come  
33  
34 16 not only by reducing opioid initiation but also by proactively de-prescribing for suitable  
35  
36 17 patients.<sup>8 14</sup> While GPs are in an optimal position for this role<sup>51</sup>, opioid stewardship is the  
37  
38 18 responsibility of all prescribing medical practitioners and allied health professionals dealing  
39  
40 19 with MSK pain management.  
41  
42  
43  
44  
45  
46  
47  
48  
49  
50  
51  
52  
53  
54  
55  
56  
57  
58  
59  
60



1

## 2 **ACKNOWLEDGEMENTS**

3 The authors acknowledge NPS MedicineWise for their support in the development of this  
4 research.

## 5 **AUTHOR CONTRIBUTIONS**

6 All authors made significant contributions to the manuscript and are responsible for its content.  
7 NS and SBT conceived the idea and planned this study. DGC was responsible for data  
8 extraction and analysis, interpreting and presenting the results. SBT and DGC wrote the first  
9 draft and the revisions. NS contributed to the manuscript refinement. All authors have read and  
10 approved the final manuscript.

## 11 **FUNDING**

12 This research received no specific grant from any funding agency in the public, commercial or  
13 not-for-profit sectors.

## 14 **COMPETING INTERESTS**

15 None declared.

## 16 **ETHICS APPROVAL**

17 The Human Research Ethics Committee of the University of Adelaide exempted this study of  
18 an ethical review as only non-identifiable data was used. Access to the data for this study was  
19 approved by the MedicineInsight Data Governance Committee (project 2016–004 and 2019-  
20 029).

## 21 **DATA SHARING STATEMENT**

22 Data may be obtained from MedicineInsight and are not publicly available. Third parties may  
23 express an interest in the information collected through MedicineInsight. The provision of  
24 information in these instances undergoes a formal approval process and is guided by the  
25 MedicineInsight independent external Data Governance Committee. This Committee includes  
26 GPs, consumer advocates, privacy experts and researchers.

27

28

29

30

31

32

## 1        1    **References**

- 2        2    1. Blyth FM, Briggs AM, Schneider CH, et al. The Global Burden of Musculoskeletal Pain-Where to  
3        3        From Here? *Am J Public Health* 2019;109(1):35-40. doi: 10.2105/AJPH.2018.304747  
4        4        [published Online First: 2018/11/30]
- 5        5    2. Briggs AM, Shiffman J, Shawar YR, et al. Global health policy in the 21st century: Challenges and  
6        6        opportunities to arrest the global disability burden from musculoskeletal health conditions.  
7        7        *Best Pract Res Clin Rheumatol* 2020;101549. doi: 10.1016/j.berh.2020.101549 [published  
8        8        Online First: 2020/07/28]
- 9        9    3. Australian Institute of Health and Welfare. Arthritis and other musculoskeletal conditions across  
10       10       the life stages. Canberra: AIHW; 2014. [cited 2019 Sep 20]. Available from:  
11       11       <http://www.aihw.gov.au/publication-detail/?id=60129547059>
- 12       12    4. Cooke G, Valenti L, Glasziou P, et al. Common general practice presentations and publication  
13       13       frequency. *Aust Fam Physician* 2013;42(1-2):65-8. [published Online First: 2013/03/27]
- 14       14    5. Gonzalez-Chica DA, Vanlint S, Hoon E, et al. Epidemiology of arthritis, chronic back pain, gout,  
15       15       osteoporosis, spondyloarthropathies and rheumatoid arthritis among 1.5 million patients in  
16       16       Australian general practice: NPS MedicineWise MedicineInsight dataset. *BMC Musculoskelet*  
17       17       *Disord* 2018;19(1):20. doi: 10.1186/s12891-018-1941-x [published Online First: 2018/01/20]
- 18       18    6. Australian Institute of Health and Welfare. Health-care expenditure on arthritis and other  
19       19       musculoskeletal conditions 2008–09. Canberra: AIHW; 2014. [cited 2019 Sep 13]. Available  
20       20       from: <http://www.aihw.gov.au/publication-detail/?id=60129548392>.
- 21       21    7. Gonzalez-Chica DA, Hill CL, Gill TK, et al. Individual diseases or clustering of health conditions?  
22       22       Association between multiple chronic diseases and health-related quality of life in adults.  
23       23       *Health Qual Life Outcomes* 2017;15(1):244. doi: 10.1186/s12955-017-0806-6 [published  
24       24       Online First: 2017/12/23]
- 25       25    8. Pain Australia. National Pain Strategy, Pain Management for all Australians, Australia.: Pain  
26       26       Australia; 2014. [cited 2019 Aug 16]. Available from:  
27       27       <http://www.painaustralia.org.au/improving-policy/national-pain-strategy>.
- 28       28    9. The Royal Australian College of General Practitioners. Guideline for the management of knee and  
29       29       hip osteoarthritis. 2nd edn. East Melbourne, Vic: RACGP; 2018. [cited 2020 Apr 03].  
30       30       Available from:  
31       31       [https://www.racgp.org.au/download/Documents/Guidelines/Musculoskeletal/guideline-for-](https://www.racgp.org.au/download/Documents/Guidelines/Musculoskeletal/guideline-for-the-management-of-knee-and-hip-oa-2nd-edition.pdf)  
32       32       [the-management-of-knee-and-hip-oa-2nd-edition.pdf](https://www.racgp.org.au/download/Documents/Guidelines/Musculoskeletal/guideline-for-the-management-of-knee-and-hip-oa-2nd-edition.pdf).
- 33       33    10. Krebs EE, Gravely A, Nugent S, et al. Effect of Opioid vs Nonopioid Medications on Pain-  
34       34       Related Function in Patients With Chronic Back Pain or Hip or Knee Osteoarthritis Pain: The

- 1  
2  
3  
4 1 SPACE Randomized Clinical Trial. *JAMA* 2018;319(9):872-82. doi: 10.1001/jama.2018.0899  
5  
6 2 [published Online First: 2018/03/07]  
7  
8 3 11. Australian Institute of Health and Welfare. Opioid harm in Australia: and comparisons between  
9 4 Australia and Canada. Canberra: AIHW; 2018. [cited 2020 Jun 05]. Available from:  
10 5 [https://www.aihw.gov.au/reports/illicit-use-of-drugs/opioid-harm-in-australia/contents/table-](https://www.aihw.gov.au/reports/illicit-use-of-drugs/opioid-harm-in-australia/contents/table-of-contents)  
11 6 [of-contents](https://www.aihw.gov.au/reports/illicit-use-of-drugs/opioid-harm-in-australia/contents/table-of-contents).  
12  
13 7 12. Bohnert AS, Valenstein M, Bair MJ, et al. Association between opioid prescribing patterns and  
14 8 opioid overdose-related deaths. *JAMA* 2011;305(13):1315-21. doi: 10.1001/jama.2011.370  
15 9 [published Online First: 2011/04/07]  
16  
17 10 13. Ray WA, Chung CP, Murray KT, et al. Prescription of Long-Acting Opioids and Mortality in  
18 11 Patients With Chronic Noncancer Pain. *JAMA* 2016;315(22):2415-23. doi:  
19 12 10.1001/jama.2016.7789 [published Online First: 2016/06/15]  
20  
21 13 14. Dowell D, Haegerich TM, Chou R. CDC Guideline for Prescribing Opioids for Chronic Pain —  
22 14 United States, 2016. *MMWR Recomm Rep* 2016;65(No. RR-1):1–49; 2016. [cited 2020 Mar  
23 15 05]. Available from <http://dx.doi.org/10.15585/mmwr.rr6501e1>.  
24  
25 16 15. Ashaye T, Hounsome N, Carnes D, et al. Opioid prescribing for chronic musculoskeletal pain in  
26 17 UK primary care: results from a cohort analysis of the COPERS trial. *BMJ Open*  
27 18 2018;8(6):e019491. doi: 10.1136/bmjopen-2017-019491 [published Online First: 2018/06/09]  
28  
29 19 16. La Frenais FL, Bedder R, Vickerstaff V, et al. Temporal Trends in Analgesic Use in Long-Term  
30 20 Care Facilities: A Systematic Review of International Prescribing. *J Am Geriatr Soc*  
31 21 2018;66(2):376-82. doi: 10.1111/jgs.15238 [published Online First: 2017/12/24]  
32  
33 22 17. Lalic S, Ilomaki J, Bell JS, et al. Prevalence and incidence of prescription opioid analgesic use in  
34 23 Australia. *Br J Clin Pharmacol* 2019;85(1):202-15. doi: 10.1111/bcp.13792 [published  
35 24 Online First: 2018/10/20]  
36  
37 25 18. Manchikanti L, Sanapati J, Benyamin RM, et al. Reframing the Prevention Strategies of the  
38 26 Opioid Crisis: Focusing on Prescription Opioids, Fentanyl, and Heroin Epidemic. *Pain*  
39 27 *Physician* 2018;21(4):309-26. [published Online First: 2018/07/27]  
40  
41 28 19. Shipton EA, Shipton EE, Shipton AJ. A Review of the Opioid Epidemic: What Do We Do About  
42 29 It? *Pain Ther* 2018;7(1):23-36. doi: 10.1007/s40122-018-0096-7 [published Online First:  
43 30 2018/04/07]  
44  
45 31 20. Karanges EA, Buckley NA, Brett J, et al. Trends in opioid utilisation in Australia, 2006-2015:  
46 32 Insights from multiple metrics. *Pharmacoepidemiol Drug Saf* 2018;27(5):504-12. doi:  
47 33 10.1002/pds.4369 [published Online First: 2017/12/28]  
48  
49 34 21. Bedson J, Chen Y, Hayward RA, et al. Trends in long-term opioid prescribing in primary care  
50 35 patients with musculoskeletal conditions: an observational database study. *Pain*  
51  
52  
53  
54  
55  
56  
57  
58  
59  
60

- 1  
2  
3  
4  
5 1 2016;157(7):1525-31. doi: 10.1097/j.pain.0000000000000557 [published Online First:  
6 2 2016/03/24]  
7  
8 3 22. Curtis JR, Xie F, Smith C, et al. Changing Trends in Opioid Use Among Patients With  
9 4 Rheumatoid Arthritis in the United States. *Arthritis Rheumatol* 2017;69(9):1733-40. doi:  
10 5 10.1002/art.40152 [published Online First: 2017/06/22]  
11  
12 6 23. Fernandes K, Martins D, Juurlink D, et al. High-Dose Opioid Prescribing and Opioid-Related  
13 7 Hospitalization: A Population-Based Study. *PLoS One* 2016;11(12):e0167479. doi:  
14 8 10.1371/journal.pone.0167479 [published Online First: 2016/12/16]  
15  
16 9 24. Larochelle MR, Zhang F, Ross-Degnan D, et al. Trends in opioid prescribing and co-prescribing  
17 10 of sedative hypnotics for acute and chronic musculoskeletal pain: 2001-2010.  
18 11 *Pharmacoepidemiol Drug Saf* 2015;24(8):885-92. doi: 10.1002/pds.3776 [published Online  
19 12 First: 2015/04/25]  
20  
21 13 25. Steinman MA, Komaiko KD, Fung KZ, et al. Use of opioids and other analgesics by older adults  
22 14 in the United States, 1999-2010. *Pain Med* 2015;16(2):319-27. doi: 10.1111/pme.12613  
23 15 [published Online First: 2014/10/30]  
24  
25 16 26. Woodard D, Van Demark RE, Jr. The Opioid Epidemic in 2017: Are We Making Progress? *SD*  
26 17 *Med* 2017;70(10):467-71. [published Online First: 2017/09/29]  
27  
28 18 27. Donovan PJ, Arroyo D, Pattullo C, et al. Trends in opioid prescribing in Australia: a systematic  
29 19 review. *Aust Health Rev* 2020;44(2):277-87. doi: 10.1071/AH18245 [published Online First:  
30 20 2020/04/04]  
31  
32 21 28. Hollingworth SA, Symons M, Khatun M, et al. Prescribing databases can be used to monitor  
33 22 trends in opioid analgesic prescribing in Australia. *Aust N Z J Public Health* 2013;37(2):132-  
34 23 8. doi: 10.1111/1753-6405.12030 [published Online First: 2013/04/05]  
35  
36 24 29. Gisev N, Pearson SA, Karanges EA, et al. To what extent do data from pharmaceutical claims  
37 25 under-estimate opioid analgesic utilisation in Australia? *Pharmacoepidemiol Drug Saf*  
38 26 2018;27(5):550-55. doi: 10.1002/pds.4329 [published Online First: 2017/10/20]  
39  
40 27 30. Islam MM, McRae IS, Mazumdar S, et al. Prescription opioid dispensing in New South Wales,  
41 28 Australia: spatial and temporal variation. *BMC Pharmacol Toxicol* 2018;19(1):30. doi:  
42 29 10.1186/s40360-018-0219-0 [published Online First: 2018/06/20]  
43  
44 30 31. Islam MM, Wollersheim D. Variation in Prescription Opioid Dispensing across Neighborhoods of  
45 31 Diverse Socioeconomic Disadvantages in Victoria, Australia. *Pharmaceuticals (Basel)*  
46 32 2018;11(4) doi: 10.3390/ph11040116 [published Online First: 2018/11/06]  
47  
48 33 32. Busingye D, Gianacas C, Pollack A, et al. Data Resource Profile: MedicineInsight, an Australian  
49 34 national primary health care database. *Int J Epidemiol* 2019;48(6):1741-41h. doi:  
50 35 10.1093/ije/dyz147 [published Online First: 2019/07/12]  
51  
52  
53  
54  
55  
56  
57  
58  
59  
60

- 1  
2  
3  
4  
5 1 33. Badmus D, Menzies R. Using general practice data to monitor influenza vaccination coverage in  
6 2 the medically at risk: a data linkage study. *BMJ Open* 2019;9(9):e031802. doi:  
7 3 10.1136/bmjopen-2019-031802 [published Online First: 2019/09/19]  
8  
9 4 34. Bernardo CO, Gonzalez-Chica D, Stocks N. Influenza-like illness and antimicrobial prescribing in  
10 5 Australian general practice from 2015 to 2017: a national longitudinal study using the  
11 6 MedicineInsight dataset. *BMJ Open* 2019;9(4):e026396. doi: 10.1136/bmjopen-2018-026396  
12 7 [published Online First: 2019/05/03]  
13  
14 8 35. Gonzalez-Chica D, Stocks N. Changes to the frequency and appropriateness of vitamin D testing  
15 9 after the introduction of new Medicare criteria for rebates in Australian general practice:  
16 10 evidence from 1.5 million patients in the NPS MedicineInsight database. *BMJ Open*  
17 11 2019;9(3):e024797. doi: 10.1136/bmjopen-2018-024797 [published Online First: 2019/03/11]  
18  
19 12 36. Khanam MA, Kitsos A, Stankovich J, et al. Chronic kidney disease monitoring in Australian  
20 13 general practice. *Aust J Gen Pract* 2019;48(3):132-37. doi: 10.31128/AJGP-07-18-4630  
21 14 [published Online First: 2019/07/01]  
22  
23 15 37. Lee CMY, Mnatzaganian G, Woodward M, et al. Sex disparities in the management of coronary  
24 16 heart disease in general practices in Australia. *Heart* 2019;105(24):1898-904. doi:  
25 17 10.1136/heartjnl-2019-315134 [published Online First: 2019/07/25]  
26  
27 18 38. SNOMED International. SNOMED CT; 2020. [cited 2020 Jun 13] Available from:  
28 19 <http://www.snomed.org/>.  
29  
30 20 39. Australian Department of Health. The Pharmaceutical Benefits Scheme. TGA Prescription Opioid  
31 21 Regulatory Reforms. Canberra; 2019. [cited 2020 Jan 30]. Available from:  
32 22 [https://www.pbs.gov.au/info/industry/listing/elements/pbac-meetings/psd/2019-12/tga-](https://www.pbs.gov.au/info/industry/listing/elements/pbac-meetings/psd/2019-12/tga-prescription-opioid-regulatory-reforms)  
33 23 [prescription-opioid-regulatory-reforms](https://www.pbs.gov.au/info/industry/listing/elements/pbac-meetings/psd/2019-12/tga-prescription-opioid-regulatory-reforms).  
34  
35 24 40. Dunn KM, Saunders KW, Rutter CM, et al. Opioid prescriptions for chronic pain and overdose: a  
36 25 cohort study. *Ann Intern Med* 2010;152(2):85-92. doi: 10.7326/0003-4819-152-2-201001190-  
37 26 00006 [published Online First: 2010/01/20]  
38  
39 27 41. Australian Bureau of Statistics. Census of Population and Housing: Socio-Economic Indexes for  
40 28 Areas (SEIFA), Australia. Cat. No. 2033.0.55.001. Canberra; 2018. [cited 2019 May 03].  
41 29 Available from: <http://www.abs.gov.au/ausstats/abs@.nsf/mf/2033.0.55.001>.  
42  
43 30 42. Tajeu GS, Sen B, Allison DB, et al. Misuse of odds ratios in obesity literature: an empirical  
44 31 analysis of published studies. *Obesity (Silver Spring)* 2012;20(8):1726-31. doi:  
45 32 10.1038/oby.2012.71 [published Online First: 2012/03/23]  
46  
47 33 43. Goldstein BA, Bhavsar NA, Phelan M, et al. Controlling for Informed Presence Bias Due to the  
48 34 Number of Health Encounters in an Electronic Health Record. *Am J Epidemiol*  
49 35 2016;184(11):847-55. doi: 10.1093/aje/kww112 [published Online First: 2016/11/18]  
50  
51  
52  
53  
54  
55  
56  
57  
58  
59  
60

- 1  
2  
3  
4  
5 1 44. Australian Institute of Health and Welfare (AIHW). Alcohol, tobacco & other drugs in Australia.  
6 2 AIHW 2020. accessed date 4/12/2020. [https://www.aihw.gov.au/reports/phe/221/alcohol-](https://www.aihw.gov.au/reports/phe/221/alcohol-tobacco-other-drugs-australia/contents/drug-types/non-medical-use-of-pharmaceutical-drugs)  
7 3 [tobacco-other-drugs-australia/contents/drug-types/non-medical-use-of-pharmaceutical-drugs](https://www.aihw.gov.au/reports/phe/221/alcohol-tobacco-other-drugs-australia/contents/drug-types/non-medical-use-of-pharmaceutical-drugs).  
8 4 doi: 10.25816/c9x6-gy43
- 9  
10  
11 5 45. Han L, Allore H, Goulet J, et al. Opioid dosing trends over eight years among US Veterans with  
12 6 musculoskeletal disorders after returning from service in support of recent conflicts. *Ann*  
13 7 *Epidemiol* 2017;27(9):563-69 e3. doi: 10.1016/j.annepidem.2017.08.015 [published Online  
14 8 First: 2017/09/12]
- 15  
16  
17 9 46. Fassio V, Aspinall SL, Zhao X, et al. Trends in opioid and nonsteroidal anti-inflammatory use and  
18 10 adverse events. *Am J Manag Care* 2018;24(3):e61-e72. [published Online First: 2018/03/20]
- 19  
20  
21 11 47. Mosher HJ, Krebs EE, Carrel M, et al. Trends in prevalent and incident opioid receipt: an  
22 12 observational study in Veterans Health Administration 2004-2012. *J Gen Intern Med*  
23 13 2015;30(5):597-604. doi: 10.1007/s11606-014-3143-z [published Online First: 2014/12/19]
- 24  
25 14 48. Smolina K, Gladstone EJ, Rutherford K, et al. Patterns and trends in long-term opioid use for non-  
26 15 cancer pain in British Columbia, 2005-2012. *Can J Public Health* 2016;107(4-5):e404-e09.  
27 16 doi: 10.17269/cjph.107.5413 [published Online First: 2016/12/28]
- 28  
29  
30 17 49. Man N, Chrzanowska A, Dobbins T, Degenhardt L, Peacock A, 2019. Trends in drug induced  
31 18 death in Australia, 1997-2018. National Drug and Alcohol Research Centre, University of  
32 19 New South Wales, Sydney, NSW 2052, Australia. Accessed 20/01/2021  
33 20 [https://ndarc.med.unsw.edu.au/sites/default/files/ndarc/resources/Drug%20Induced%20Death](https://ndarc.med.unsw.edu.au/sites/default/files/ndarc/resources/Drug%20Induced%20Deaths%20December%202019%20Bulletin_1.pdf)  
34 21 [s%20December%202019%20Bulletin\\_1.pdf](https://ndarc.med.unsw.edu.au/sites/default/files/ndarc/resources/Drug%20Induced%20Deaths%20December%202019%20Bulletin_1.pdf).
- 35  
36  
37 22 50. Caughey GE, Gadzhanova S, Shakib S, et al. Concomitant prescribing of opioids and  
38 23 benzodiazepines in Australia, 2012-2017. *Med J Aust* 2019;210(1):39-40. doi:  
39 24 10.5694/mja2.12026 [published Online First: 2019/01/14]
- 40  
41  
42 25 51. Cheatle MD, Barker C. Improving opioid prescription practices and reducing patient risk in the  
43 26 primary care setting. *J Pain Res* 2014;7:301-11. doi: 10.2147/jpr.S37306 [published Online  
44 27 First: 2014/06/27]
- 45  
46  
47 28 52. Woodley M. Mundipharma fined for misleading advertising of opioids. The Royal Australian  
48 29 College of General Practitioners - News. [cited 2021 Jan 21]. Available from  
49 30 [https://www1.racgp.org.au/newsgp/professional/mundipharma-fined-for-misleading-](https://www1.racgp.org.au/newsgp/professional/mundipharma-fined-for-misleading-advertising-of-op)  
50 31 [advertising-of-op](https://www1.racgp.org.au/newsgp/professional/mundipharma-fined-for-misleading-advertising-of-op). 2019
- 51  
52  
53 32 53. Mordecai L, Reynolds C, Donaldson LJ, et al. Patterns of regional variation of opioid prescribing  
54 33 in primary care in England: a retrospective observational study. *Br J Gen Pract*  
55 34 2018;68(668):e225-e33. doi: 10.3399/bjgp18X695057 [published Online First: 2018/02/15]
- 56  
57  
58  
59 35  
60

**Table 1. Cumulative incidence of long-term opioid prescription for the management of musculoskeletal conditions according to practice and patient's characteristics. regular patients<sup>a</sup> aged 18+ years. Australia, 2012-2018.**

| Year                                                     | Long-term opioids - incidence (%) |           |           |           |           |           |           |     |
|----------------------------------------------------------|-----------------------------------|-----------|-----------|-----------|-----------|-----------|-----------|-----|
|                                                          | 2012                              | 2013      | 2014      | 2015      | 2016      | 2017      | 2018      |     |
| <b>regular patients with a MSK 'at risk'<sup>a</sup></b> | 157,528                           | 185,358   | 210,089   | 231,961   | 253,648   | 281,655   | 190,079   |     |
|                                                          | 3.6                               | 3.6       | 3.8       | 3.7       | 3.8       | 3.5       | 3.0       |     |
| <b>Overall incidence - % (95%CI)</b>                     | (3.4;3.8)                         | (3.4;3.8) | (3.6;4.0) | (3.5;3.9) | (3.6;4.0) | (3.4;3.7) | (2.8;3.1) |     |
| <b>Practice characteristics<sup>c</sup></b>              | % <sup>d</sup>                    |           |           |           |           |           |           |     |
| <b>State</b>                                             |                                   |           |           |           |           |           |           |     |
| NSW                                                      | 36.2                              | 3.6       | 3.5       | 3.8       | 3.7       | 3.7       | 3.4       | 2.8 |
| VIC                                                      | 21.5                              | 3.7       | 3.6       | 3.9       | 3.9       | 3.9       | 3.7       | 3.1 |
| QLD                                                      | 14.3                              | 3.3       | 3.5       | 3.8       | 3.6       | 3.5       | 3.6       | 2.7 |
| WA                                                       | 11.3                              | 3.7       | 3.8       | 3.9       | 3.8       | 4.3       | 4.1       | 3.5 |
| TAS                                                      | 10.4                              | 3.3       | 3.3       | 3.4       | 3.4       | 3.4       | 3.1       | 2.8 |
| SA                                                       | 3.0                               | 3.2       | 3.8       | 3.2       | 3.9       | 3.7       | 3.8       | 2.9 |
| ACT                                                      | 2.7                               | 6.0       | 4.6       | 5.1       | 4.8       | 4.2       | 4.5       | 3.3 |
| NT                                                       | 0.6                               | 2.6       | 3.6       | 3.5       | 2.5       | 3.7       | 2.6       | 2.6 |
| <b>Rurality</b>                                          |                                   |           |           |           |           |           |           |     |
| Major cities                                             | 60.0                              | 3.1       | 3.2       | 3.4       | 3.4       | 3.3       | 3.2       | 2.7 |
| Inner regional                                           | 26.7                              | 3.8       | 4.0       | 4.0       | 3.9       | 4.1       | 3.9       | 3.2 |
| Outer regional/Remote                                    | 13.3                              | 4.9       | 4.5       | 5.0       | 4.8       | 5.0       | 4.5       | 3.7 |
| <b>IRSAD Quintile</b>                                    |                                   |           |           |           |           |           |           |     |
| Very high                                                | 25.8                              | 2.8       | 2.9       | 3.1       | 2.9       | 3.1       | 2.8       | 2.4 |
| High                                                     | 16.7                              | 3.4       | 3.4       | 3.4       | 3.4       | 3.6       | 3.4       | 3.0 |
| Middle                                                   | 22.8                              | 3.8       | 3.6       | 3.9       | 4.0       | 4.0       | 3.9       | 3.1 |
| Low                                                      | 15.6                              | 3.8       | 3.7       | 4.0       | 4.0       | 3.8       | 3.6       | 3.0 |
| Very Low                                                 | 19.1                              | 4.0       | 4.3       | 4.5       | 4.4       | 4.4       | 4.1       | 3.3 |
| <b>Patient's characteristics<sup>e</sup></b>             |                                   |           |           |           |           |           |           |     |
| <b>Gender</b>                                            |                                   |           |           |           |           |           |           |     |
| Male                                                     | 44.5                              | 3.4       | 3.4       | 3.6       | 3.7       | 3.7       | 3.4       | 3.0 |

|                                          |      |            |            |            |            |            |            |            |
|------------------------------------------|------|------------|------------|------------|------------|------------|------------|------------|
| Female                                   | 55.5 | 3.7        | 3.7        | 3.9        | 3.8        | 3.8        | 3.6        | 2.9        |
| <b>Age</b>                               |      |            |            |            |            |            |            |            |
| 18-34 years                              | 18.9 | <b>1.9</b> | <b>2.0</b> | <b>1.8</b> | <b>1.7</b> | <b>1.7</b> | <b>1.5</b> | <b>1.3</b> |
| 35-49 years                              | 23.9 | <b>2.9</b> | <b>2.9</b> | <b>3.0</b> | <b>2.9</b> | <b>2.8</b> | <b>2.6</b> | <b>2.2</b> |
| 50-64 years                              | 28.8 | <b>3.2</b> | <b>3.1</b> | <b>3.2</b> | <b>3.1</b> | <b>3.2</b> | <b>3.0</b> | <b>2.4</b> |
| 65-79 years                              | 21.9 | <b>4.4</b> | <b>4.4</b> | <b>4.6</b> | <b>4.5</b> | <b>4.5</b> | <b>4.2</b> | <b>3.6</b> |
| 80+ years                                | 6.5  | <b>6.5</b> | <b>6.5</b> | <b>7.0</b> | <b>7.4</b> | <b>7.6</b> | <b>7.3</b> | <b>6.2</b> |
| <b>Aboriginal/Torres Strait Islander</b> |      |            |            |            |            |            |            |            |
| No                                       | 77.9 | <b>3.6</b> | <b>3.6</b> | <b>3.8</b> | <b>3.8</b> | <b>3.8</b> | <b>3.5</b> | <b>3.0</b> |
| Yes                                      | 1.9  | <b>6.5</b> | <b>6.0</b> | <b>6.5</b> | <b>7.3</b> | <b>7.0</b> | <b>6.5</b> | <b>5.3</b> |
| Not recorded                             | 20.2 | <b>3.0</b> | <b>3.1</b> | <b>3.1</b> | <b>3.0</b> | <b>3.3</b> | <b>3.3</b> | <b>2.7</b> |
| <b>IRSAD Quintile</b>                    |      |            |            |            |            |            |            |            |
| Very high                                | 23.9 | <b>2.8</b> | <b>2.8</b> | <b>2.9</b> | <b>2.8</b> | <b>3.0</b> | <b>2.8</b> | <b>2.5</b> |
| High                                     | 16.9 | <b>3.3</b> | <b>3.4</b> | <b>3.8</b> | <b>3.7</b> | <b>3.6</b> | <b>3.4</b> | <b>2.7</b> |
| Middle                                   | 23.0 | <b>3.8</b> | <b>3.6</b> | <b>3.8</b> | <b>4.0</b> | <b>3.8</b> | <b>3.8</b> | <b>3.0</b> |
| Low                                      | 17.3 | <b>3.7</b> | <b>3.7</b> | <b>4.0</b> | <b>3.8</b> | <b>4.2</b> | <b>3.7</b> | <b>3.2</b> |
| Very Low                                 | 18.7 | <b>4.1</b> | <b>4.4</b> | <b>4.3</b> | <b>4.3</b> | <b>4.4</b> | <b>3.9</b> | <b>3.4</b> |

<sup>a</sup> At least three consultations in any two consecutive years from 2012 to 2018. Numbers (n) represent the number of regular patients with a musculoskeletal condition in that year, excluding those who were already on opioids (i.e. patients “at risk”)

<sup>b</sup> Values in parenthesis represent the 95% confidence intervals of the incidence

<sup>c</sup> Logistic regression models with all practice characteristics mutually adjusted. Values in ‘bold’ represent those associations with a p-value <0.01

<sup>d</sup> Values represent the sample distribution according to these characteristics

<sup>e</sup> Logistic regression models with all patient characteristics mutually adjusted + adjustment for practice characteristics. Values in ‘bold’ represent those associations with a p-value <0.01

MSK: Musculoskeletal condition; IRSAD: Index of Relative Socioeconomic Advantage and Disadvantage.



**Table 2. Average time on long-term opioid prescription for the management of musculoskeletal conditions among incident cases according to practice and patient's characteristics. regular patients<sup>a</sup> aged 18+ years. Australia, 2012-2018.**

|                                              | Time on long-term opioids among incident cases (days) |            |            |            |            |            |           |
|----------------------------------------------|-------------------------------------------------------|------------|------------|------------|------------|------------|-----------|
|                                              | 2012                                                  | 2013       | 2014       | 2015       | 2016       | 2017       | 2018      |
| <b>Incident cases</b>                        | 5,621                                                 | 6,647      | 7,944      | 8,652      | 9,572      | 9,958      | 5,672     |
|                                              | 287                                                   | 301        | 295        | 288        | 294        | 229        | 140       |
| <b>Median duration (95%CI)<sup>b</sup></b>   | (266;308)                                             | (281;321)  | (279;311)  | (272;304)  | (281;307)  | (221;237)  | (135;145) |
| <b>Practice characteristics<sup>c</sup></b>  |                                                       |            |            |            |            |            |           |
| <b>State</b>                                 |                                                       |            |            |            |            |            |           |
| NSW                                          | 266                                                   | <b>299</b> | 308        | 273        | <b>292</b> | <b>210</b> | 134       |
| VIC                                          | 283                                                   | <b>309</b> | 312        | 313        | <b>268</b> | <b>230</b> | 141       |
| QLD                                          | 342                                                   | <b>243</b> | 264        | 278        | <b>297</b> | <b>244</b> | 146       |
| WA                                           | 294                                                   | <b>288</b> | 281        | 333        | <b>336</b> | <b>246</b> | 141       |
| TAS                                          | 339                                                   | <b>367</b> | 205        | 367        | <b>292</b> | <b>241</b> | 138       |
| SA                                           | 269                                                   | <b>393</b> | 255        | 292        | <b>402</b> | <b>214</b> | 154       |
| ACT                                          | 327                                                   | <b>299</b> | 431        | 338        | <b>321</b> | <b>267</b> | 186       |
| NT                                           | 249                                                   | <b>683</b> | 261        | 206        | <b>237</b> | <b>116</b> | 108       |
| <b>Rurality</b>                              |                                                       |            |            |            |            |            |           |
| Major cities                                 | 301                                                   | 327        | 288        | 309        | 290        | 221        | 137       |
| Inner regional                               | 309                                                   | 313        | 319        | 290        | 316        | 234        | 142       |
| Outer regional/Remote                        | 242                                                   | 243        | 310        | 309        | 284        | 240        | 148       |
| <b>IRSAD Quintile</b>                        |                                                       |            |            |            |            |            |           |
| Very high                                    | <b>203</b>                                            | <b>214</b> | <b>244</b> | <b>203</b> | <b>247</b> | <b>186</b> | 128       |
| High                                         | <b>231</b>                                            | <b>300</b> | <b>285</b> | <b>299</b> | <b>263</b> | <b>221</b> | 143       |
| Middle                                       | <b>263</b>                                            | <b>319</b> | <b>290</b> | <b>302</b> | <b>320</b> | <b>222</b> | 142       |
| Low                                          | <b>393</b>                                            | <b>341</b> | <b>361</b> | <b>341</b> | <b>293</b> | <b>259</b> | 145       |
| Very Low                                     | <b>349</b>                                            | <b>346</b> | <b>322</b> | <b>355</b> | <b>333</b> | <b>251</b> | 141       |
| <b>Patient's characteristics<sup>d</sup></b> |                                                       |            |            |            |            |            |           |
| <b>Gender</b>                                |                                                       |            |            |            |            |            |           |
| Male                                         | <b>278</b>                                            | <b>272</b> | <b>272</b> | <b>259</b> | <b>271</b> | <b>211</b> | 137       |
| Female                                       | <b>311</b>                                            | <b>349</b> | <b>329</b> | <b>336</b> | <b>323</b> | <b>238</b> | 143       |

| <b>Age</b>                               |     |            |     |     |            |            |     |
|------------------------------------------|-----|------------|-----|-----|------------|------------|-----|
| 18-34 years                              | 230 | <b>361</b> | 276 | 363 | <b>247</b> | <b>233</b> | 147 |
| 35-49 years                              | 335 | <b>361</b> | 345 | 327 | <b>350</b> | <b>257</b> | 154 |
| 50-64 years                              | 299 | <b>337</b> | 320 | 293 | <b>306</b> | <b>221</b> | 142 |
| 65-79 years                              | 278 | <b>257</b> | 277 | 279 | <b>242</b> | <b>203</b> | 132 |
| 80+ years                                | 336 | <b>371</b> | 326 | 336 | <b>379</b> | <b>249</b> | 143 |
| <b>Aboriginal/Torres Strait Islander</b> |     |            |     |     |            |            |     |
| No                                       | 302 | 319        | 308 | 303 | 303        | 224        | 139 |
| Yes                                      | 442 | 376        | 415 | 405 | 381        | 274        | 158 |
| Not recorded                             | 245 | 315        | 278 | 296 | 279        | 232        | 146 |
| <b>IRSAD Quintile</b>                    |     |            |     |     |            |            |     |
| Very high                                | 238 | 287        | 236 | 268 | 277        | 230        | 127 |
| High                                     | 249 | 315        | 258 | 296 | 292        | 218        | 140 |
| Middle                                   | 278 | 315        | 306 | 297 | 319        | 233        | 139 |
| Low                                      | 358 | 333        | 360 | 323 | 303        | 216        | 134 |
| Very Low                                 | 343 | 337        | 343 | 330 | 308        | 232        | 159 |

<sup>a</sup> At least three consultations in any two consecutive years from 2012 to 2018.

<sup>b</sup> Values in parenthesis represent the 95% confidence intervals of the median time on opioids. The corresponding interquartile values are 2012=91-1177; 2013=98-1214; 2014=98-1145; 2015=94-989; 2016=97-759; 2017=91-474; 2018=78-255.

<sup>c</sup> Quantile regression models with all practice characteristics mutually adjusted. Values in 'bold' represent those associations with a p-value <0.01

<sup>d</sup> Quantile regression models with all patient characteristics mutually adjusted + adjustment for practice characteristics. Values in 'bold' represent those associations with a p-value <0.01

MSK: Musculoskeletal condition; IRSAD: Index of Relative Socioeconomic Advantage and Disadvantage.

1  
2  
3  
4 **Figure 1. Algorithm of data extraction from MedicineInsight database for the diagnosis**  
5 **of MSK and opioid prescriptions. Period 2012-2018**  
6  
7

8  
9 **Figure 2. Frequency of long-term opioid prescription for the management of**  
10 **musculoskeletal conditions. Period 2012-2018.** Number in parenthesis (n) represent the total  
11 number of regular patients with a musculoskeletal condition in that year from a total of 811,174  
12 regular patients investigated over the whole period.  
13  
14

15  
16  
17 **Figure 3. Proportion of patients starting long-term opioid prescriptions in any year that**  
18 **were still receiving these prescriptions in subsequent years. Period 2012-2018.** Each  
19 connected line represents a different cohort followed over time. Numbers in parenthesis (n)  
20 represent the total number of regular patients with a musculoskeletal condition that started long-  
21 term opioid prescriptions in that year.  
22  
23

24  
25  
26 **Supplementary Table 1. Practice and patient characteristics in the whole sample. Regular**  
27 **patients<sup>a</sup> aged 18+ years. MedicineInsight data, 2018.**  
28

29  
30  
31 **Supplementary Figure 1. Rate of long-term opioid prescribing for different**  
32 **musculoskeletal conditions in 2012 and 2018.**  
33  
34  
35  
36  
37  
38  
39  
40  
41  
42  
43  
44  
45  
46  
47  
48  
49  
50  
51  
52  
53  
54  
55  
56  
57  
58  
59  
60

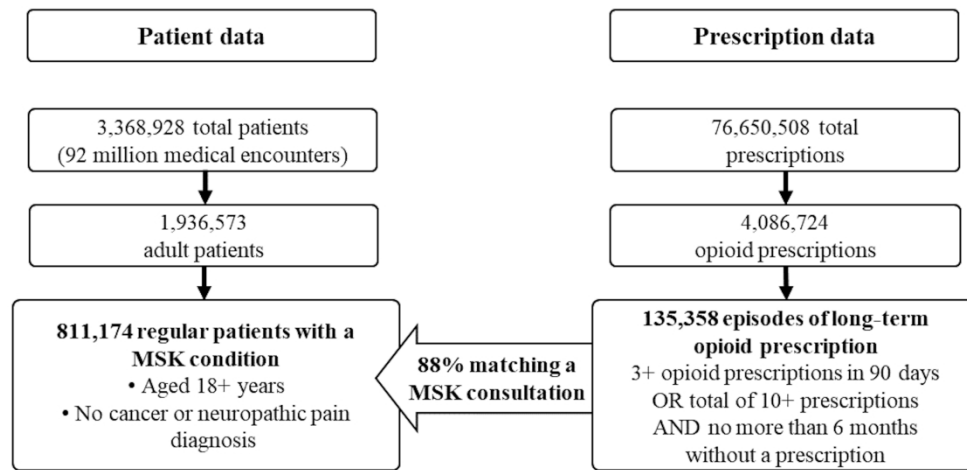

23 Figure 1. Algorithm of data extraction from MedicineInsight database for the diagnosis of MSK and opioid  
24 prescriptions. Period 2012-2018

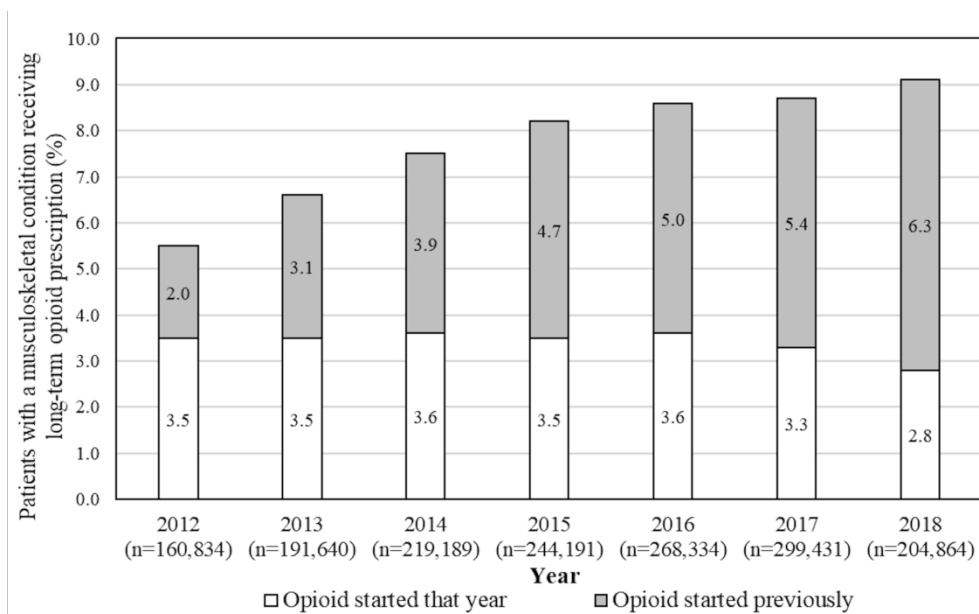

Figure 2. Frequency of long-term opioid prescription for the management of musculoskeletal conditions. regular patients aged 18+ years. Australia, 2012-2018. Number in parenthesis (n) represent the total number of regular patients with a musculoskeletal condition in that year from a total of 811,174 regular patients investigated over the whole period.

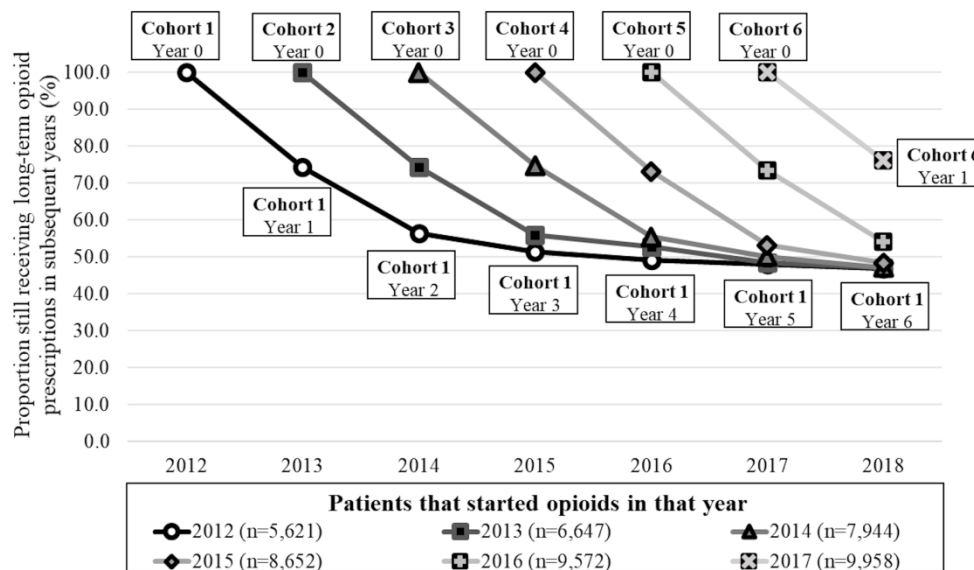

Figure 3. Proportion of patients starting long-term opioid prescriptions in any year that were still receiving these prescriptions in subsequent years. Period 2012-2018. Each connected line represents a different cohort followed over time. Numbers in parenthesis (n) represent the total number of regular patients with a musculoskeletal condition that started long-term opioid prescriptions in that year.

**Supplementary Table 1. Practice and patient characteristics in the whole sample. Regular patients<sup>a</sup> aged 18+ years. MedicineInsight data, 2018.**

| Practice characteristics                              | % <sup>b</sup> | 95% CI    |
|-------------------------------------------------------|----------------|-----------|
| <b>State</b>                                          |                |           |
| NSW                                                   | 35.5           | 30.1-41.2 |
| VIC                                                   | 21.7           | 17.1-27.2 |
| QLD                                                   | 14.4           | 10.9-18.8 |
| WA                                                    | 12.0           | 8.5-16.6  |
| TAS                                                   | 10.0           | 6.8-14.4  |
| SA                                                    | 2.6            | 1.4-5.0   |
| ACT                                                   | 2.8            | 1.3-6.1   |
| NT                                                    | 1.0            | 0.4-2.4   |
| <b>Rurality</b>                                       |                |           |
| Major cities                                          | 60.5           | 54.7-66.1 |
| Inner regional                                        | 25.9           | 21.1-31.4 |
| Outer regional/Remote                                 | 13.5           | 10.2-17.8 |
| <b>IRSAD Quintile</b>                                 |                |           |
| Very high                                             | 27.0           | 22.0-32.7 |
| High                                                  | 16.4           | 12.6-21.0 |
| Middle                                                | 22.6           | 18.0-28.1 |
| Low                                                   | 18.8           | 11.3-18.9 |
| Very Low                                              | 18.8           | 14.5-24.1 |
| <b>Patient's characteristics</b>                      |                |           |
| <b>Gender</b>                                         |                |           |
| Male                                                  | 42.2           | 41.7-42.8 |
| Female                                                | 57.7           | 57.1-58.2 |
| <b>Age</b>                                            |                |           |
| 18-34 years                                           | 23.0           | 22.1-23.9 |
| 35-49 years                                           | 23.2           | 22.6-23.9 |
| 50-64 years                                           | 25.1           | 24.7-25.5 |
| 65-79 years                                           | 15.4           | 14.9-16.0 |
| 80+ years                                             | 13.3           | 12.6-14.0 |
| <b>Aboriginal/Torres Strait Islander</b>              |                |           |
| No                                                    | 76.9           | 73.9-79.6 |
| Yes                                                   | 2.0            | 1.1-2.3   |
| Not recorded                                          | 21.1           | 18.4-24.2 |
| <b>IRSAD Quintile</b>                                 |                |           |
| Very high                                             | 25.0           | 21.3-29.2 |
| High                                                  | 16.9           | 14.6-19.4 |
| Middle                                                | 22.7           | 19.5-26.3 |
| Low                                                   | 16.5           | 13.9-19.5 |
| Very Low                                              | 18.1           | 15.0-21.8 |
| <b>Chronic musculoskeletal conditions<sup>c</sup></b> |                |           |
| Chronic back pain                                     | 16.6           | 15.9-17.2 |
| Osteoarthritis                                        | 13.7           | 13.1-14.3 |
| Tenosynovitis                                         | 6.7            | 6.4-7.1   |
| Osteoporosis                                          | 4.2            | 4.0-4.4   |
| Gout                                                  | 4.0            | 3.8-4.1   |
| Rheumatoid arthritis                                  | 0.89           | 0.85-0.94 |
| Fibromyalgia                                          | 0.69           | 0.64-0.73 |

|   |                        |      |           |
|---|------------------------|------|-----------|
| 1 |                        |      |           |
| 2 |                        |      |           |
| 3 | Polymyalgia_rheumatica | 0.68 | 0.63-0.74 |
| 4 | Osteoarthritis         | 0.38 | 0.34-0.43 |
| 5 | Spondyloarthritis      | 0.28 | 0.26-0.31 |
| 6 | Fatigue syndrome       | 0.22 | 0.20-0.24 |
| 7 | Paget disease          | 0.11 | 0.01-0.12 |
| 8 | Myofascial pain        | 0.03 | 0.02-0.05 |
| 9 |                        |      |           |

10 <sup>a</sup> At least three consultations in any two consecutive years

11 <sup>b</sup> Values represent the distribution (prevalence) in the whole sample of regular patients aged 18+ years  
 12 according to these characteristics

13 <sup>c</sup> List of chronic musculoskeletal conditions diagnosed at any time between 2011 and 2018  
 14 IRSAD: Index of Relative Socioeconomic Advantage and Disadvantage.

15  
16  
17  
18  
19  
20  
21  
22  
23  
24  
25  
26  
27  
28  
29  
30  
31  
32  
33  
34  
35  
36  
37  
38  
39  
40  
41  
42  
43  
44  
45  
46  
47  
48  
49  
50  
51  
52  
53  
54  
55  
56  
57  
58  
59  
60

For peer review only



1  
2  
3  
4  
5  
6  
7  
8  
9  
10  
11  
12  
13  
14  
15  
16  
17  
18  
19  
20  
21  
22  
23  
24  
25  
26  
27  
28  
29  
30  
31  
32  
33  
34  
35  
36  
37  
38  
39  
40  
41  
42  
43  
44  
45  
46

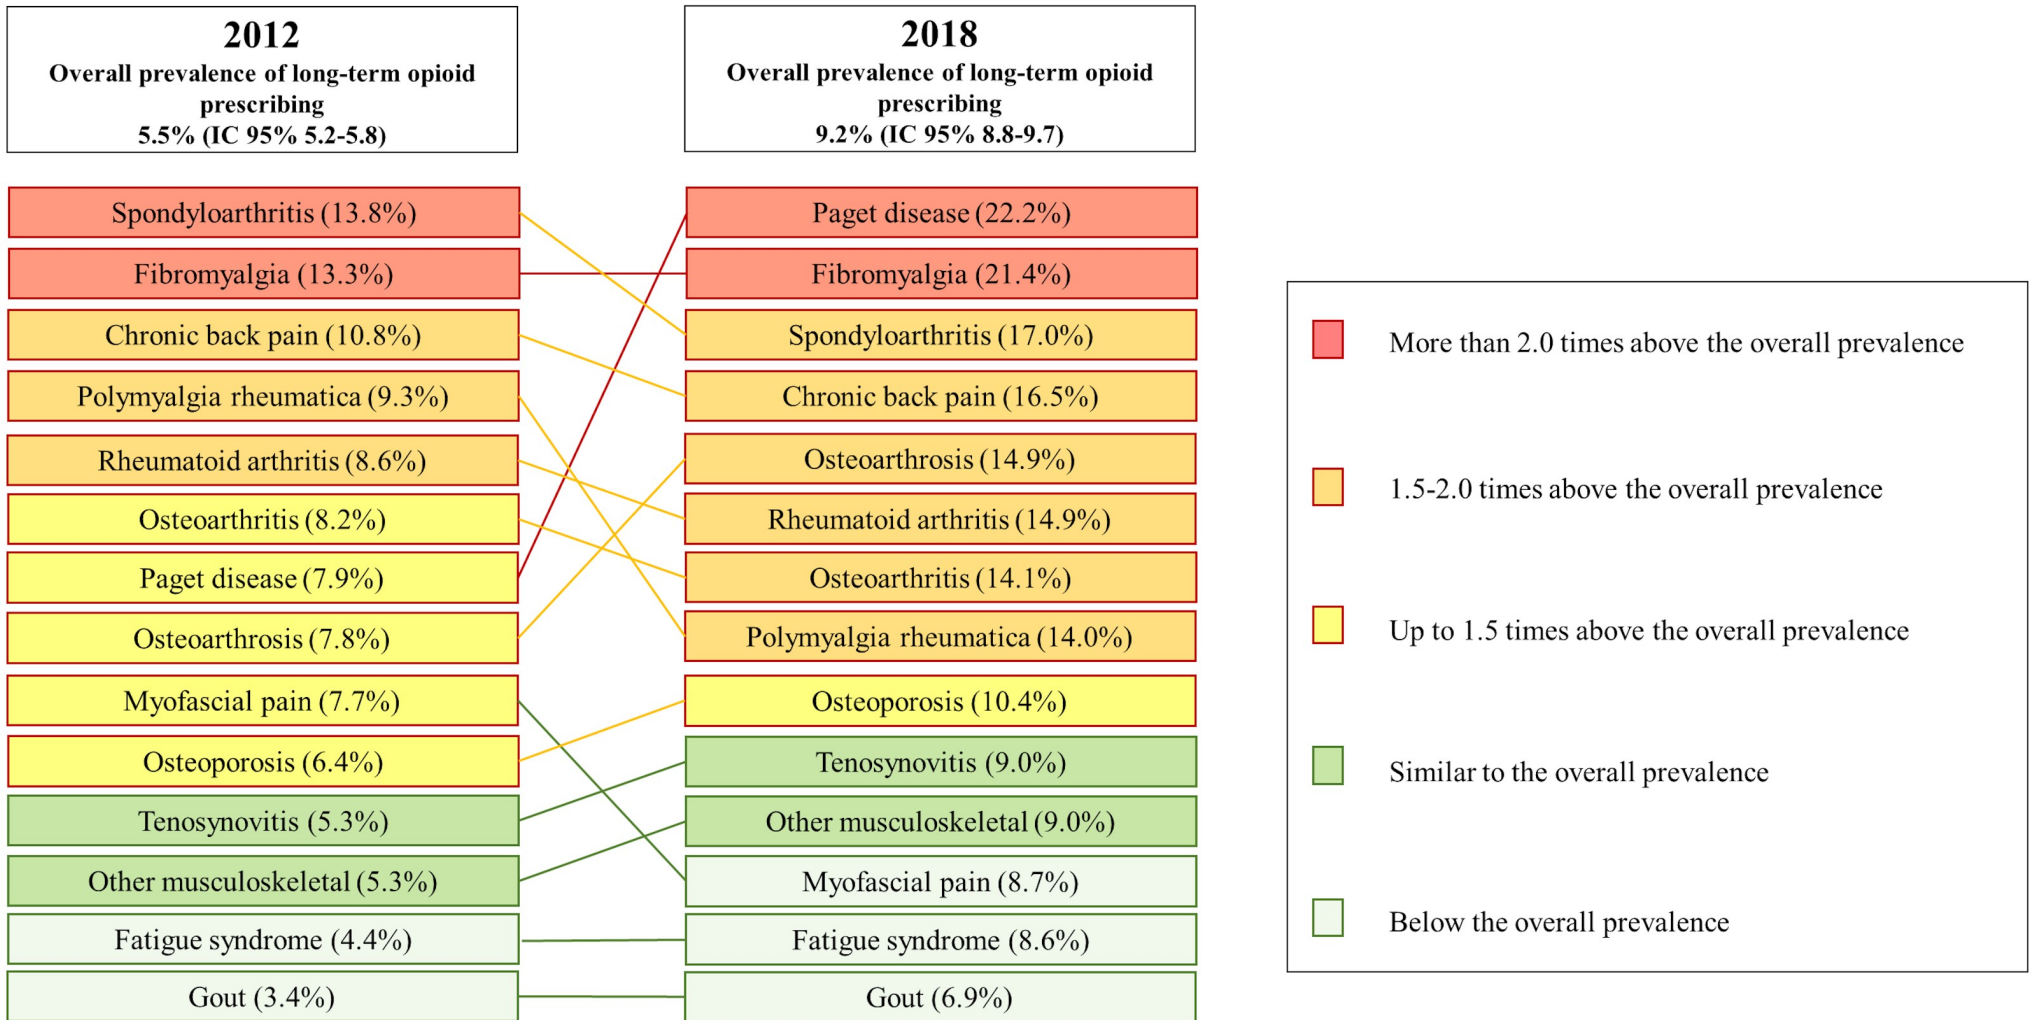

STROBE Statement—Checklist of items that should be included in reports of *cohort studies*

|                              | Item No | Recommendation                                                                                                                                                                                                                                                                                                         | Page No                                                  |
|------------------------------|---------|------------------------------------------------------------------------------------------------------------------------------------------------------------------------------------------------------------------------------------------------------------------------------------------------------------------------|----------------------------------------------------------|
| <b>Title and abstract</b>    | 1       | (a) Indicate the study's design with a commonly used term in the title or the abstract<br>(b) Provide in the abstract an informative and balanced summary of what was done and what was found                                                                                                                          | 1,2<br>2                                                 |
| <b>Introduction</b>          |         |                                                                                                                                                                                                                                                                                                                        |                                                          |
| Background/rationale         | 2       | Explain the scientific background and rationale for the investigation being reported                                                                                                                                                                                                                                   | 4                                                        |
| Objectives                   | 3       | State specific objectives, including any prespecified hypotheses                                                                                                                                                                                                                                                       | 5                                                        |
| <b>Methods</b>               |         |                                                                                                                                                                                                                                                                                                                        |                                                          |
| Study design                 | 4       | Present key elements of study design early in the paper                                                                                                                                                                                                                                                                | 5                                                        |
| Setting                      | 5       | Describe the setting, locations, and relevant dates, including periods of recruitment, exposure, follow-up, and data collection                                                                                                                                                                                        | 5-6                                                      |
| Participants                 | 6       | (a) Give the eligibility criteria, and the sources and methods of selection of participants. Describe methods of follow-up<br>(b) For matched studies, give matching criteria and number of exposed and unexposed                                                                                                      | 6                                                        |
| Variables                    | 7       | Clearly define all outcomes, exposures, predictors, potential confounders, and effect modifiers. Give diagnostic criteria, if applicable                                                                                                                                                                               | 6-7                                                      |
| Data sources/<br>measurement | 8*      | For each variable of interest, give sources of data and details of methods of assessment (measurement). Describe comparability of assessment methods if there is more than one group                                                                                                                                   | 6-7                                                      |
| Bias                         | 9       | Describe any efforts to address potential sources of bias                                                                                                                                                                                                                                                              | 6-8                                                      |
| Study size                   | 10      | Explain how the study size was arrived at                                                                                                                                                                                                                                                                              | 6                                                        |
| Quantitative variables       | 11      | Explain how quantitative variables were handled in the analyses. If applicable, describe which groupings were chosen and why                                                                                                                                                                                           | 7-8                                                      |
| Statistical methods          | 12      | (a) Describe all statistical methods, including those used to control for confounding<br>(b) Describe any methods used to examine subgroups and interactions<br>(c) Explain how missing data were addressed<br>(d) If applicable, explain how loss to follow-up was addressed<br>(e) Describe any sensitivity analyses | 8<br>-<br>6-7<br>-<br>-                                  |
| <b>Results</b>               |         |                                                                                                                                                                                                                                                                                                                        |                                                          |
| Participants                 | 13*     | (a) Report numbers of individuals at each stage of study—eg numbers potentially eligible, examined for eligibility, confirmed eligible, included in the study, completing follow-up, and analysed<br>(b) Give reasons for non-participation at each stage<br>(c) Consider use of a flow diagram                        | 6,9,<br>Tables<br>1,2<br>-<br>Fig. 1                     |
| Descriptive data             | 14*     | (a) Give characteristics of study participants (eg demographic, clinical, social) and information on exposures and potential confounders<br>(b) Indicate number of participants with missing data for each variable of interest<br>(c) Summarise follow-up time (eg, average and total amount)                         | 9,<br>Table<br>1<br>9,<br>Table<br>1<br>9,<br>Table<br>1 |

1  
2  
3  
4  
5  
6  
7  
8  
9  
10  
11  
12  
13  
14  
15  
16  
17  
18  
19  
20  
21  
22  
23  
24  
25  
26  
27  
28  
29  
30  
31  
32  
33  
34  
35  
36  
37  
38  
39  
40  
41  
42  
43  
44  
45  
46  
47  
48  
49  
50  
51  
52  
53  
54  
55  
56  
57  
58  
59  
60

Outcome data

15\*

Report numbers of outcome events or summary measures over time

9, 10,  
Fig. 2,  
Tables  
1,2

For peer review only

|    |                          |    |                                                                                                                                                                                                              |                  |
|----|--------------------------|----|--------------------------------------------------------------------------------------------------------------------------------------------------------------------------------------------------------------|------------------|
| 1  | Main results             | 16 | (a) Give unadjusted estimates and, if applicable, confounder-adjusted estimates and their precision (eg, 95% confidence interval). Make clear which confounders were adjusted for and why they were included | 9-10, tables 1,2 |
| 2  |                          |    | (b) Report category boundaries when continuous variables were categorized                                                                                                                                    | 9-10, tables 1,2 |
| 3  |                          |    | (c) If relevant, consider translating estimates of relative risk into absolute risk for a meaningful time period                                                                                             | 9-10, tables 1,2 |
| 4  |                          |    |                                                                                                                                                                                                              |                  |
| 5  |                          |    |                                                                                                                                                                                                              |                  |
| 6  |                          |    |                                                                                                                                                                                                              |                  |
| 7  |                          |    |                                                                                                                                                                                                              |                  |
| 8  |                          |    |                                                                                                                                                                                                              |                  |
| 9  |                          |    |                                                                                                                                                                                                              |                  |
| 10 | Other analyses           | 17 | Report other analyses done—eg analyses of subgroups and interactions, and sensitivity analyses                                                                                                               | -                |
| 11 | <b>Discussion</b>        |    |                                                                                                                                                                                                              |                  |
| 12 | Key results              | 18 | Summarise key results with reference to study objectives                                                                                                                                                     | 10               |
| 13 | Limitations              | 19 | Discuss limitations of the study, taking into account sources of potential bias or imprecision. Discuss both direction and magnitude of any potential bias                                                   | 12               |
| 14 | Interpretation           | 20 | Give a cautious overall interpretation of results considering objectives, limitations, multiplicity of analyses, results from similar studies, and other relevant evidence                                   | 11-12            |
| 15 | Generalisability         | 21 | Discuss the generalisability (external validity) of the study results                                                                                                                                        | 11-12            |
| 16 | <b>Other information</b> |    |                                                                                                                                                                                                              |                  |
| 17 | Funding                  | 22 | Give the source of funding and the role of the funders for the present study and, if applicable, for the original study on which the present article is based                                                | 13               |

27 \*Give information separately for exposed and unexposed groups.

28  
29  
30 **Note:** An Explanation and Elaboration article discusses each checklist item and gives methodological background and published examples of transparent reporting. The STROBE checklist is best used in conjunction with this article (freely available on the Web sites of PLoS Medicine at <http://www.plosmedicine.org/>, Annals of Internal Medicine at <http://www.annals.org/>, and Epidemiology at <http://www.epidem.com/>). Information on the STROBE Initiative is available at <http://www.strobe-statement.org>.
