# Supplementary material for: Trends in long-term opioid prescriptions for musculoskeletal conditions in Australian general practice: a national longitudinal study using MedicineInsight, 2012–2018
Source: PubMed Central journal article supplement — BMJ Open. 2021 Apr 7;11(4):e045418. doi: 10.1136/bmjopen-2020-045418 (PMC8031026; doi:10.1136/bmjopen-2020-045418), 2021-04-07
Supplement: bmjopen-2020-045418supp001.pdf [file bmjopen-2020-045418supp001.pdf]

**Supplementary Table 1. Practice and patient characteristics in the whole sample. Regular patients<sup>a</sup> aged 18+ years. MedicineInsight data, 2018.**

| <b>Practice characteristics</b>                       | <b>%<sup>b</sup></b> | <b>95% CI</b> |
|-------------------------------------------------------|----------------------|---------------|
| <b>State</b>                                          |                      |               |
| NSW                                                   | 35.5                 | 30.1-41.2     |
| VIC                                                   | 21.7                 | 17.1-27.2     |
| QLD                                                   | 14.4                 | 10.9-18.8     |
| WA                                                    | 12.0                 | 8.5-16.6      |
| TAS                                                   | 10.0                 | 6.8-14.4      |
| SA                                                    | 2.6                  | 1.4-5.0       |
| ACT                                                   | 2.8                  | 1.3-6.1       |
| NT                                                    | 1.0                  | 0.4-2.4       |
| <b>Rurality</b>                                       |                      |               |
| Major cities                                          | 60.5                 | 54.7-66.1     |
| Inner regional                                        | 25.9                 | 21.1-31.4     |
| Outer regional/Remote                                 | 13.5                 | 10.2-17.8     |
| <b>IRSAD Quintile</b>                                 |                      |               |
| Very high                                             | 27.0                 | 22.0-32.7     |
| High                                                  | 16.4                 | 12.6-21.0     |
| Middle                                                | 22.6                 | 18.0-28.1     |
| Low                                                   | 18.8                 | 11.3-18.9     |
| Very Low                                              | 18.8                 | 14.5-24.1     |
| <b>Patient's characteristics</b>                      |                      |               |
| <b>Gender</b>                                         |                      |               |
| Male                                                  | 42.2                 | 41.7-42.8     |
| Female                                                | 57.7                 | 57.1-58.2     |
| <b>Age</b>                                            |                      |               |
| 18-34 years                                           | 23.0                 | 22.1-23.9     |
| 35-49 years                                           | 23.2                 | 22.6-23.9     |
| 50-64 years                                           | 25.1                 | 24.7-25.5     |
| 65-79 years                                           | 15.4                 | 14.9-16.0     |
| 80+ years                                             | 13.3                 | 12.6-14.0     |
| <b>Aboriginal/Torres Strait Islander</b>              |                      |               |
| No                                                    | 76.9                 | 73.9-79.6     |
| Yes                                                   | 2.0                  | 1.1-2.3       |
| Not recorded                                          | 21.1                 | 18.4-24.2     |
| <b>IRSAD Quintile</b>                                 |                      |               |
| Very high                                             | 25.0                 | 21.3-29.2     |
| High                                                  | 16.9                 | 14.6-19.4     |
| Middle                                                | 22.7                 | 19.5-26.3     |
| Low                                                   | 16.5                 | 13.9-19.5     |
| Very Low                                              | 18.1                 | 15.0-21.8     |
| <b>Chronic musculoskeletal conditions<sup>c</sup></b> |                      |               |
| Chronic back pain                                     | 16.6                 | 15.9-17.2     |
| Osteoarthritis                                        | 13.7                 | 13.1-14.3     |
| Tenosynovitis                                         | 6.7                  | 6.4-7.1       |
| Osteoporosis                                          | 4.2                  | 4.0-4.4       |
| Gout                                                  | 4.0                  | 3.8-4.1       |
| Rheumatoid arthritis                                  | 0.89                 | 0.85-0.94     |
| Fibromyalgia                                          | 0.69                 | 0.64-0.73     |

---

|                        |      |           |
|------------------------|------|-----------|
| Polymyalgia_rheumatica | 0.68 | 0.63-0.74 |
| Osteoarthritis         | 0.38 | 0.34-0.43 |
| Spondyloarthritis      | 0.28 | 0.26-0.31 |
| Fatigue syndrome       | 0.22 | 0.20-0.24 |
| Paget disease          | 0.11 | 0.01-0.12 |
| Myofascial pain        | 0.03 | 0.02-0.05 |

---

<sup>a</sup> At least three consultations in any two consecutive years

<sup>b</sup> Values represent the distribution (prevalence) in the whole sample of regular patients aged 18+ years according to these characteristics

<sup>c</sup> List of chronic musculoskeletal conditions diagnosed at any time between 2011 and 2018

IRSAD: Index of Relative Socioeconomic Advantage and Disadvantage.
