# Supplementary figures and images for: Trends in long-term opioid prescriptions for musculoskeletal conditions in Australian general practice: a national longitudinal study using MedicineInsight, 2012–2018
Source: PubMed Central journal article supplement — BMJ Open. 2021 Apr 7;11(4):e045418. doi: 10.1136/bmjopen-2020-045418 (PMC8031026; doi:10.1136/bmjopen-2020-045418), 2021-04-07

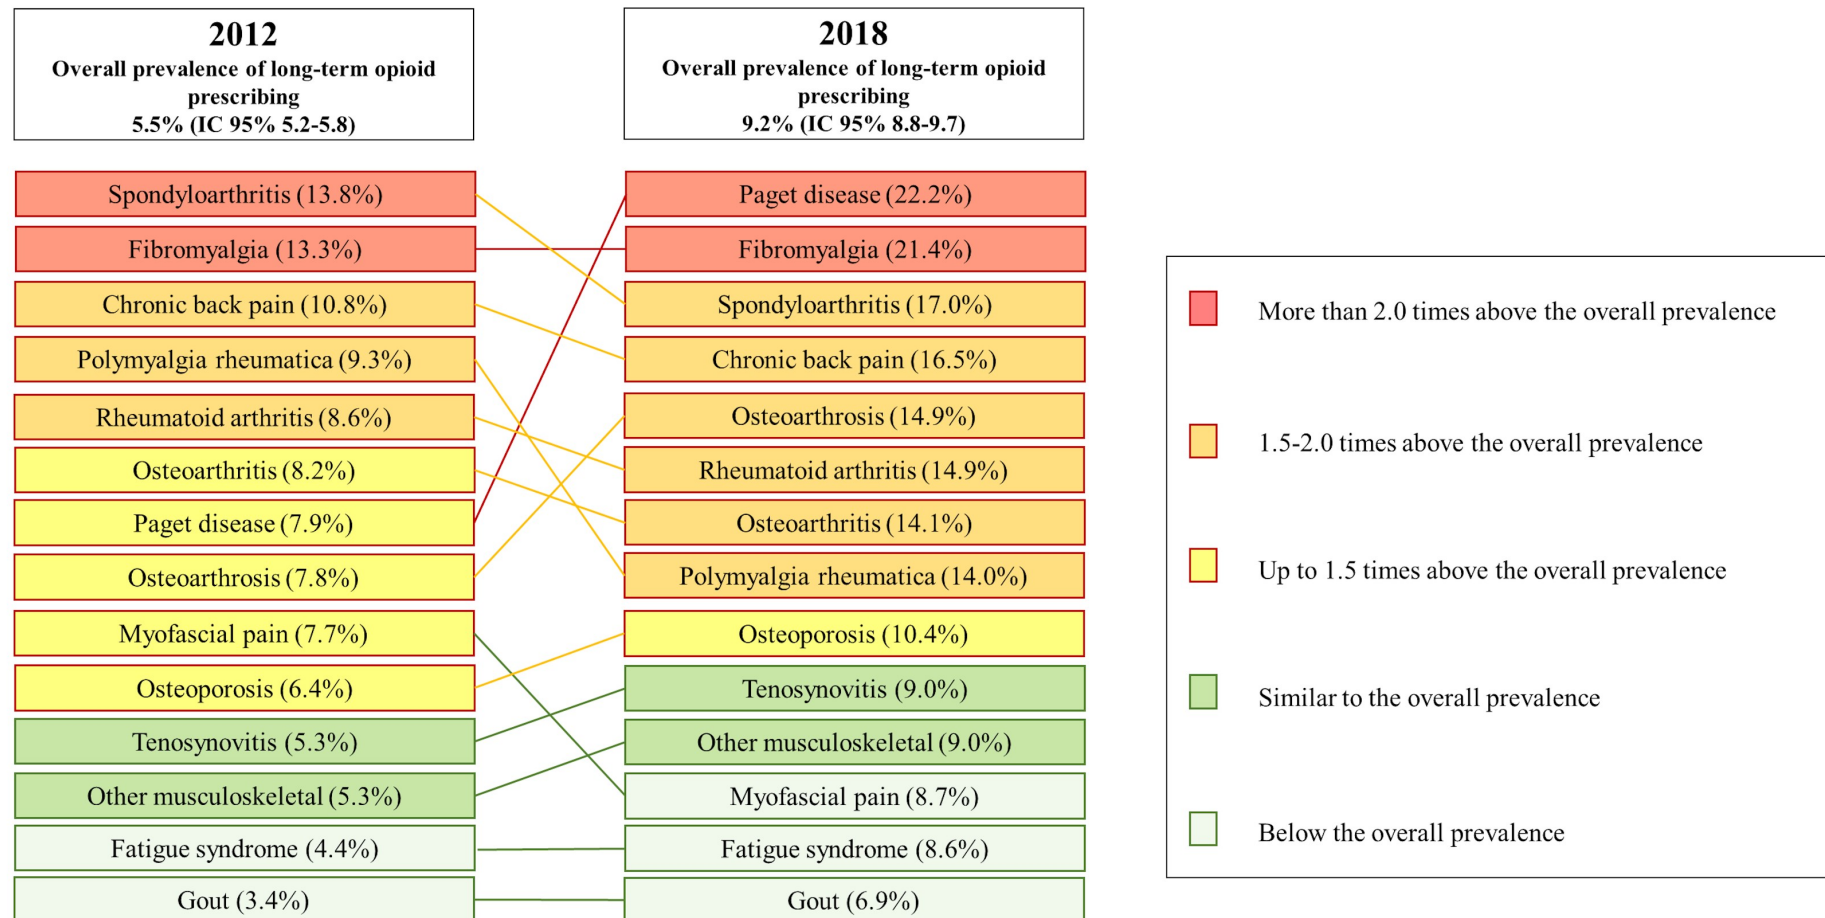

Supplement: bmjopen-2020-045418supp002.pdf [file bmjopen-2020-045418supp002.pdf]
